# Supplementary material for: Effects of LPS from Rhodobacter sphaeroides, a Purple Non-Sulfur Bacterium (PNSB), on the Gene Expression of Rice Root
Source: MDPI journal article supplement (doi:10.3390/microorganisms11071676), 2023-06-28
Supplement: s1 [file s1]

Table S3 List of 21 chalcone synthase genes (Figure 4)

| LPS          |          |           |          | Dead cells |           |          |                                                                                                     |
|--------------|----------|-----------|----------|------------|-----------|----------|-----------------------------------------------------------------------------------------------------|
| GeneID       | baseMean | logFC     | padj     | baseMean   | logFC     | padj     | Description                                                                                         |
| Os05g0212600 | 29.29402 | 2.410994  | 0.419049 | 32.34188   | 2.574478  | 0.019425 | Chalcone/stilbene synthase, N-terminal domain containing protein. (Os05t0212600-00)                 |
| Os10g0168300 | 21.23668 | 2.373493  | 0.346504 | 28.21588   | 2.843561  | 0.001305 | Similar to Chalcone and stilbene synthases, N-terminal domain containing protein. (Os10t0168300-00) |
| Os10g0168500 | 7.804006 | 3.886519  | 0.136665 | 8.924321   | 4.092004  | 0.071341 | Similar to Chalcone and stilbene synthases, N-terminal domain containing protein. (Os10t0168500-00) |
| Os10g0177300 | 20.56308 | 5.378024  | 0.006105 | 19.48063   | 5.280179  | 0.000234 | Similar to Chalcone and stilbene synthases, N-terminal domain containing protein. (Os10t0177300-00) |
| Os11g0529036 | 5.914962 | 4.123683  | 0.400558 | 9.592993   | 4.830888  | 0.032533 | Similar to Chalcone and stilbene synthases, N-terminal domain containing protein. (Os11t0529036-00) |
| Os11g0529100 | 11.7402  | 3.229448  | 0.484836 | 15.45315   | 3.649044  | 0.009083 | Similar to Chalcone and stilbene synthases, N-terminal domain containing protein. (Os11t0529100-00) |
| Os11g0529125 | 1.963383 | 4.447775  | 0.770926 | 4.09374    | 5.498691  | 0.37864  | Similar to Chalcone and stilbene synthases, N-terminal domain containing protein. (Os11t0529125-00) |
| Os11g0529900 | 78.55086 | -0.371614 | 0.999758 | 70.4007    | -0.789074 | 0.99986  | Chalcone/stilbene synthase, N-terminal domain containing protein. (Os11t0529900-00)                 |
| Os04g0103900 | 4.119857 | 3.564309  | 0.487887 | 0.490591   | -0.812004 | 0.99986  | Similar to Chalcone synthase. (Os04t0103900-01)                                                     |
| Os05g0212900 | 351.6929 | 1.788267  | 0.184124 | 404.54     | 2.031264  | 9.78E-05 | Similar to Chalcone synthase J (EC 2.3.1.74) (Naringenin-chalcone synthase J). (Os05t0212900-00)    |
| Os05g0213100 | 215.9852 | 1.741442  | 0.353929 | 264.0679   | 2.096895  | 0.072893 | Similar to Chalcone and stilbene synthases, N-terminal domain containing protein. (Os05t0213100-00) |
| Os07g0214900 | 15.73968 | 0.649187  | 0.999758 | 16.95568   | 0.815933  | 0.99986  | Chalcone synthase,                                                                                  |

|              |          |           |          |          |           |          |                                                                                                       |
|--------------|----------|-----------|----------|----------|-----------|----------|-------------------------------------------------------------------------------------------------------|
|              |          |           |          |          |           |          | Sakuranetin biosynthesis under UV stress conditions (Os07t0214900-01)                                 |
| Os07g0271500 | 1.505223 | 0.4571    | 0.999758 | 0.821158 | -1.802872 | 0.99986  | Similar to Chalcone synthase. (Os07t0271500-01)                                                       |
| Os07g0525900 | 0.517925 | 1.036191  | 0.999758 | 0.157576 | -0.910699 | 0.99986  | Similar to Chalcone synthase. (Os07t0525900-00)                                                       |
| Os10g0162856 | 419.6071 | 1.351509  | 0.337794 | 423.2235 | 1.354421  | 0.01565  | Similar to Chalcone and stilbene synthases, N-terminal domain containing protein. (Os10t0162856-00)   |
| Os02g0778500 | 199.0228 | -0.02007  | 0.999758 | 220.4712 | 0.241649  | 0.99986  | Chalcone isomerase domain containing protein. (Os02t0778500-01)                                       |
| Os06g0203600 | 241.4538 | 0.36881   | 0.83351  | 238.8641 | 0.319295  | 0.99986  | Chalcone isomerase domain containing protein. (Os06t0203600-01)                                       |
| Os07g0571600 | 53.57363 | -0.183078 | 0.999758 | 59.0907  | 0.080611  | 0.99986  | Chalcone isomerase domain containing protein. (Os07t0571600-00)                                       |
| Os07g0411300 | 14.70538 | 1.266973  | 0.691628 | 13.08771 | 1.010168  | 0.99986  | Polyketide synthase, Pollen exine and Ubisch body patterning, Pollen wall formation (Os07t0411300-01) |
| Os10g0158400 | 430.8074 | 1.152041  | 0.464978 | 418.8224 | 1.077063  | 0.137006 | Type III polyketide synthase (Os10t0158400-01)                                                        |
| Os10g0167900 | 142.3608 | 3.308983  | 0.369027 | 141.2312 | 3.285438  | 7.17E-05 | Type III polyketide synthase (Os10t0167900-01)                                                        |
