# Supplementary material for: Effects of LPS from Rhodobacter sphaeroides, a Purple Non-Sulfur Bacterium (PNSB), on the Gene Expression of Rice Root
Source: MDPI journal article supplement (doi:10.3390/microorganisms11071676), 2023-06-28
Supplement: s1 [file s1]

Table S5 List of 57 glutathione S-transferase genes (Figure 6)

| LPS          |            |            |            | Dead cell  |            |            |                                                                                                                                                                                                                                                                                             |
|--------------|------------|------------|------------|------------|------------|------------|---------------------------------------------------------------------------------------------------------------------------------------------------------------------------------------------------------------------------------------------------------------------------------------------|
| GeneID       | baseMean   | logFC      | padj       | baseMean   | logFC      | padj       | Description                                                                                                                                                                                                                                                                                 |
| Os01g0353400 | 17.6547642 | -0.6749816 | 0.9997583  | 14.9807217 | -1.4251431 | 0.86812684 | Glutathione S-transferase, Tolerance to salinity and oxidative stress, ROS-scavenging activity (Os01t0353400-01)                                                                                                                                                                            |
| Os01g0369700 | 8246.97786 | 0.00878457 | 0.9997583  | 8560.40646 | 0.09135341 | 0.99985955 | Similar to Glutathione S-transferase GST 8 (EC 2.5.1.18). (Os01t0369700-01); Similar to Glutathione S-transferase GST 8 (EC 2.5.1.18). (Os01t0369700-03)                                                                                                                                    |
| Os01g0371500 | 8306.16306 | 1.00593351 | 0.00247544 | 7726.82679 | 0.82752692 | 0.05213049 | Similar to Glutathione-S-transferase 19E50. (Os01t0371500-01)                                                                                                                                                                                                                               |
| Os01g0372400 | 0.15931913 | -0.8928971 | 0.9997583  | 0.85983787 | 1.97792521 | 0.99985955 | Glutathione S-transferase, C-terminal-like domain containing protein. (Os01t0372400-01)                                                                                                                                                                                                     |
| Os01g0374000 | 1.51563337 | -0.8708423 | 0.9997583  | 6.09889469 | 2.37257282 | 0.97468288 | Similar to Glutathione S-transferase I (EC 2.5.1.18) (GST-I) (GST-29) (GST class- phi). (Os01t0374000-01)                                                                                                                                                                                   |
| Os01g0692000 | 33.7868084 | -0.7422364 | 0.79154664 | 48.4464145 | 0.35358115 | 0.99985955 | Similar to Glutathione S-transferase GSTU6. (Os01t0692000-01)                                                                                                                                                                                                                               |
| Os01g0692100 | 105.182467 | -0.579467  | 0.58098864 | 117.301405 | -0.2399701 | 0.99985955 | Glutathione S-transferase, C-terminal-like domain containing protein. (Os01t0692100-01)                                                                                                                                                                                                     |
| Os01g0764000 | 93722.6658 | -0.0373546 | 0.9997583  | 99009.7613 | 0.09560298 | 0.99985955 | Similar to Glutathione S-transferase I (EC 2.5.1.18) (GST-I) (GST-29) (GST class- phi). (Os01t0764000-01); Similar to Glutathione s-transferase ii (Fragment). (Os01t0764000-02); Similar to Glutathione S-transferase I (EC 2.5.1.18) (GST-I) (GST-29) (GST class- phi). (Os01t0764000-03) |

|              |            |            |           |            |            |            |                                                                                                                                                                         |
|--------------|------------|------------|-----------|------------|------------|------------|-------------------------------------------------------------------------------------------------------------------------------------------------------------------------|
| Os01g0949700 | 316.512158 | 0.0765036  | 0.9997583 | 308.216701 | -0.021306  | 0.99985955 | Glutathione S-transferase, C-terminal domain containing protein. (Os01t0949700-01)                                                                                      |
| Os01g0949750 | 718.290303 | -0.2544097 | 0.9997583 | 714.677849 | -0.296854  | 0.99985955 | Similar to Glutathione S-transferase GST 28 (Fragment). (Os01t0949750-00)                                                                                               |
| Os01g0949800 | 15.3790267 | 0.2821488  | 0.9997583 | 15.2603185 | 0.23629268 | 0.99985955 | Similar to Glutathione S-transferase GST 28 (EC 2.5.1.18) (Fragment). (Os01t0949800-01)                                                                                 |
| Os01g0950000 | 215.266094 | 1.33918976 | 0.176127  | 242.377972 | 1.55904993 | 0.04625054 | Similar to Glutathione S-transferase GST 28 (EC 2.5.1.18) (Fragment). (Os01t0950000-01)                                                                                 |
| Os02g0319300 | 1100.30492 | 0.07884794 | 0.9997583 | 1085.70393 | 0.01783257 | 0.99985955 | Glutathione S-transferase, C-terminal-like domain containing protein. (Os02t0319300-01)                                                                                 |
| Os02g0564000 | 781.545529 | -0.0173567 | 0.9997583 | 785.541736 | -0.0260339 | 0.99985955 | Similar to Glutathione S-transferase. (Os02t0564000-01)                                                                                                                 |
| Os02g0814800 | 4.4945036  | -0.5738402 | 0.9997583 | 4.28346893 | -0.8057472 | 0.99985955 | Glutathione S-transferase, C-terminal-like domain containing protein. (Os02t0814800-01)                                                                                 |
| Os03g0134900 | 1669.03495 | 0.25049082 | 0.9997583 | 1595.50296 | 0.108368   | 0.99985955 | Similar to Glutathione S-transferase GSTF14 (Fragment). (Os03t0134900-01)                                                                                               |
| Os03g0135100 | 1550.86875 | -0.0271579 | 0.9997583 | 1609.28551 | 0.05519604 | 0.99985955 | Glutathione S-transferase GSTF15. (Os03t0135100-01)                                                                                                                     |
| Os03g0135200 | 794.267907 | -0.2098556 | 0.9997583 | 845.507851 | -0.046383  | 0.99985955 | Similar to Glutathione S-transferase GST 9 (EC 2.5.1.18). (Os03t0135200-01)                                                                                             |
| Os03g0135300 | 260.847786 | 0.16708404 | 0.9997583 | 253.547579 | 0.06519898 | 0.99985955 | Similar to Glutathione S-transferase GST 10 (EC 2.5.1.18). (Os03t0135300-01)                                                                                            |
| Os03g0283100 | 4690.98884 | 0.07605347 | 0.9997583 | 4656.66127 | 0.03200748 | 0.99985955 | Lambda class glutathione S-transferase, Maize In2-1 homologue, Detoxification of some chemical compounds (Os03t0283100-01); Similar to In2-1 protein. (Os03t0283100-02) |

|              |            |            |            |            |            |            |                                                                                                                                                                                  |
|--------------|------------|------------|------------|------------|------------|------------|----------------------------------------------------------------------------------------------------------------------------------------------------------------------------------|
| Os03g0595600 | 0.52619954 | 1.00846536 | 0.9997583  | 0.49766447 | 0.89255096 | 0.99985955 | Similar to Glutathione S-transferase, N-terminal domain containing protein, expressed. (Os03t0595600-00)                                                                         |
| Os04g0435500 | 273.785572 | -0.2495923 | 0.9997583  | 305.154971 | 0.05243199 | 0.99985955 | Glutathione S-transferase, C-terminal-like domain containing protein. (Os04t0435500-01); Glutathione S-transferase, C-terminal-like domain containing protein. (Os04t0435500-02) |
| Os06g0168000 | 685.926852 | 0.02932851 | 0.9997583  | 675.697046 | -0.0382975 | 0.99985955 | Glutathione S-transferase, C-terminal-like domain containing protein. (Os06t0168000-01)                                                                                          |
| Os07g0168300 | 181.42289  | 0.53571491 | 0.90057491 | 170.026934 | 0.35664725 | 0.99985955 | Similar to Glutathione S-transferase GSTU6. (Os07t0168300-01)                                                                                                                    |
| Os07g0468100 | 148.219424 | 0.56857979 | 0.9997583  | 157.220792 | 0.694192   | 0.99985955 | Similar to Glutathione S-transferase GST 19 (EC 2.5.1.18). (Os07t0468100-01); Similar to Glutathione S-transferase GST 19 (EC 2.5.1.18). (Os07t0468100-02)                       |
| Os08g0293400 | 6.21542201 | -0.8736342 | 0.9997583  | 5.95977587 | -1.0667403 | 0.99985955 | Similar to Glutathione S-transferase. (Os08t0293400-01)                                                                                                                          |
| Os08g0550500 | 273.194198 | -0.1084726 | 0.9997583  | 271.428301 | -0.1519864 | 0.99985955 | Similar to Glutathione s-transferase (Fragment). (Os08t0550500-01)                                                                                                               |
| Os09g0367700 | 2300.47192 | -0.3051138 | 0.9997583  | 2441.25283 | -0.1434843 | 0.99985955 | Tau class glutathione S-transferase, Tolerance against sheath blight disease (Os09t0367700-01)                                                                                   |
| Os10g0368100 | 55.6086534 | -0.7931328 | 0.60748446 | 58.4685739 | -0.6385016 | 0.99985955 | Similar to Glutathione S-transferase GSTU35 (Fragment). (Os10t0368100-01)                                                                                                        |
| Os10g0481300 | 187.81437  | -1.4606235 | 0.00127622 | 218.507984 | -0.8007085 | 0.99985955 | Similar to Glutathione S-transferase, N-terminal domain containing protein, expressed. (Os10t0481300-01)                                                                         |

|              |            |            |            |            |            |            |                                                                                                                                           |
|--------------|------------|------------|------------|------------|------------|------------|-------------------------------------------------------------------------------------------------------------------------------------------|
| Os10g0525400 | 111.994981 | -0.3747168 | 0.9997583  | 128.917751 | 0.03360821 | 0.99985955 | Similar to Glutathione S-transferase GSTU31 (Fragment). (Os10t0525400-01); Similar to glutathione S-transferase GST 34. (Os10t0525400-03) |
| Os10g0525500 | 221.61041  | -0.6281091 | 0.30392287 | 224.13463  | -0.6174553 | 0.50379024 | Similar to glutathione transferase31. (Os10t0525500-01)                                                                                   |
| Os10g0525800 | 216.686015 | -0.6175566 | 0.20516778 | 252.924976 | -0.1319361 | 0.99985955 | Similar to Glutathione S-transferase GSTU31 (Fragment). (Os10t0525800-00)                                                                 |
| Os10g0527400 | 523.631541 | -0.2036716 | 0.9997583  | 473.77792  | -0.5627408 | 0.43960551 | Similar to Tau class GST protein 3. (Os10t0527400-01)                                                                                     |
| Os10g0527601 | 486.873559 | -0.6076473 | 0.56268435 | 461.359893 | -0.8449023 | 0.90026975 | Glutathione S-transferase, C-terminal-like domain containing protein. (Os10t0527601-00)                                                   |
| Os10g0527800 | 2074.60424 | 0.0069774  | 0.9997583  | 1862.34388 | -0.3485036 | 0.99985955 | Glutathione S-transferase, Regulation of leaf senescence (Os10t0527800-01)                                                                |
| Os10g0528100 | 19.4217116 | 0.55592343 | 0.9997583  | 24.7749254 | 1.09688663 | 0.99985955 | Similar to Glutathione S-transferase GST 42 (EC 2.5.1.18) (Fragment). (Os10t0528100-01)                                                   |
| Os10g0528200 | 95.4509961 | 0.1816307  | 0.9997583  | 79.7640038 | -0.3710577 | 0.99985955 | Similar to Glutathione S-transferase TSI-1 (EC 2.5.1.18) (Glutathione S-transferase 1). (Os10t0528200-01)                                 |
| Os10g0528300 | 15121.8564 | -0.5032463 | 0.59812793 | 15905.8129 | -0.3605093 | 0.99985955 | Tau class GST protein 4. (Os10t0528300-01)                                                                                                |
| Os10g0528400 | 4087.5061  | 0.19696724 | 0.9997583  | 3784.36365 | -0.042806  | 0.99985955 | Glutathione S-transferase, C-terminal-like domain containing protein. (Os10t0528400-01)                                                   |
| Os10g0528900 | 17.2298628 | 0.27428104 | 0.9997583  | 17.1163931 | 0.2334173  | 0.99985955 | Similar to Tau class GST protein 3. (Os10t0528900-01)                                                                                     |
| Os10g0529300 | 3134.47186 | 0.35653882 | 0.49082945 | 3447.95174 | 0.5729982  | 0.99985955 | Similar to Tau class GST protein 3. (Os10t0529300-01)                                                                                     |
| Os10g0529400 | 1871.0056  | 0.29131626 | 0.77936455 | 1833.88101 | 0.21639641 | 0.99985955 | Similar to Glutathione S-transferase GSTU6. (Os10t0529400-01)                                                                             |

|              |            |            |            |            |            |            |                                                                                                                                                          |
|--------------|------------|------------|------------|------------|------------|------------|----------------------------------------------------------------------------------------------------------------------------------------------------------|
| Os10g0529500 | 536.243081 | 0.08311505 | 0.9997583  | 485.411864 | -0.2365997 | 0.99985955 | Tau class glutathione S-transferase, Heavy metal and drought stress tolerance (Os10t0529500-01)                                                          |
| Os10g0529700 | 25.626413  | -0.7856339 | 0.94275992 | 25.1115052 | -0.9022717 | 0.99985955 | Similar to glutathione transferase35. (Os10t0529700-01)                                                                                                  |
| Os10g0529800 | 484.8533   | -0.1779624 | 0.9997583  | 457.403088 | -0.3872773 | 0.99985955 | Similar to Tau class GST protein 4. (Os10t0529800-00)                                                                                                    |
| Os10g0530200 | 5378.92187 | 1.41121582 | 0.05811231 | 6406.93234 | 1.73302886 | 9.69E-05   | Similar to Glutathione S-transferase TSI-1 (EC 2.5.1.18) (Glutathione S-transferase 1). (Os10t0530200-01)                                                |
| Os10g0530400 | 106.323752 | 0.40503076 | 0.9997583  | 77.5407453 | -0.5504403 | 0.99985955 | Similar to Glutathione-S-transferase Cla47. (Os10t0530400-01)                                                                                            |
| Os10g0530500 | 2.32109565 | 2.6606507  | 0.97414645 | 1.24795385 | 1.56450567 | 0.99985955 | Similar to Glutathione-S-transferase Cla47. (Os10t0530500-01)                                                                                            |
| Os10g0530600 | 63.8003888 | 0.42178721 | 0.98327061 | 56.1177503 | 0.06307373 | 0.99985955 | Similar to Glutathione S-transferase GST 20 (EC 2.5.1.18). (Os10t0530600-01)                                                                             |
| Os10g0530900 | 2686.73418 | 1.33054807 | 9.50E-05   | 2670.39228 | 1.30294398 | 0.56509499 | Similar to Glutathione S-transferase GST 30 (EC 2.5.1.18). (Os10t0530900-01); Similar to cDNA clone:006-203-F02, full insert sequence. (Os10t0530900-03) |
| Os10g0531300 | 642.610369 | 0.07216628 | 0.9997583  | 650.126024 | 0.08628842 | 0.99985955 | Similar to Glutathione transferase (EC 2.5.1.18). (Os10t0531300-01)                                                                                      |
| Os10g0531400 | 650.523052 | 0.06944562 | 0.9997583  | 666.932798 | 0.12050287 | 0.99985955 | Glutathione S-transferase GST 30 (EC 2.5.1.18). (Os10t0531400-01)                                                                                        |
| Os10g0543800 | 469.568089 | -0.392123  | 0.9997583  | 459.986875 | -0.4837871 | 0.99985955 | Similar to Glutathione S-transferase GST 11 (EC 2.5.1.18). (Os10t0543800-00)                                                                             |
| Os11g0245100 | 85.7082185 | 0.09235883 | 0.9997583  | 79.5410926 | -0.1500874 | 0.99985955 | Similar to Glutathione S-transferase 2. (Os11t0245100-01)                                                                                                |
| Os12g0123200 | 58.0386091 | -0.182632  | 0.9997583  | 60.657312  | -0.0754561 | 0.99985955 | Glutathione S-transferase GST 7 (EC 2.5.1.18). (Os12t0123200-01)                                                                                         |
