# Supplementary material for: Effects of LPS from Rhodobacter sphaeroides, a Purple Non-Sulfur Bacterium (PNSB), on the Gene Expression of Rice Root
Source: MDPI journal article supplement (doi:10.3390/microorganisms11071676), 2023-06-28
Supplement: s1 [file s1]

Table S4 List of 14 genes coding ROS/RNS-generating enzymes (Figure 5), including one NADH oxidase, 9 NADPH oxidase and 4 nitric oxide synthase genes

| LPS          |          |           |          | Dead cells |           |          |                                                                                                                                                                                                                               |
|--------------|----------|-----------|----------|------------|-----------|----------|-------------------------------------------------------------------------------------------------------------------------------------------------------------------------------------------------------------------------------|
| GeneID       | baseMean | logFC     | padj     | baseMean   | logFC     | padj     | Description                                                                                                                                                                                                                   |
| Os01g0360200 | 5926.35  | 0.411546  | 0.583766 | 5431.719   | 0.160031  | 0.99986  | NADPH oxidase, Disease resistance (Os01t0360200-01); Similar to Respiratory burst oxidase homolog. (Os01t0360200-03)                                                                                                          |
| Os01g0370000 | 1007.306 | 1.139927  | 0.048896 | 1113.616   | 1.330914  | 0.000765 | NADH:flavin oxidoreductase/NADH oxidase, N-terminal domain containing protein. (Os01t0370000-01)                                                                                                                              |
| Os01g0734200 | 1107.331 | -0.564871 | 0.707804 | 1189.152   | -0.346035 | 0.99986  | Plasma membrane NADPH oxidase, Developmental regulation, Drought-stress response (Os01t0734200-01)                                                                                                                            |
| Os01g0784800 | 5575.759 | -0.152284 | 0.999758 | 5891.946   | -0.012816 | 0.99986  | Flavodoxin/nitric oxide synthase domain containing protein. (Os01t0784800-01)                                                                                                                                                 |
| Os02g0104700 | 93.52522 | -0.407993 | 0.962912 | 103.6077   | -0.109775 | 0.99986  | Nitric oxide synthase, Chloroplast ribosome biogenesis and/or translation, Regulation of biosynthesis of chloroplast proteins at lower temperature (Os02t0104700-01); Similar to Nitric oxide associated 1. (Os02t0104700-02) |
| Os03g0279900 | 501.9288 | 0.196645  | 0.999758 | 473.1344   | 0.009353  | 0.99986  | Nitric oxide synthase-interacting domain containing protein. (Os03t0279900-01)                                                                                                                                                |
| Os03g0775300 | 186.0569 | -0.407513 | 0.960804 | 192.0499   | -0.329625 | 0.99986  | Flavodoxin/nitric oxide synthase domain containing protein. (Os03t0775300-01)                                                                                                                                                 |
| Os05g0528000 | 1504.079 | -0.240178 | 0.999758 | 1588.656   | -0.095724 | 0.99986  | Respiratory burst oxidase homolog protein, Reactive oxygen species formation (Os05t0528000-01)                                                                                                                                |
| Os12g0541300 | 37.57515 | -1.251504 | 0.62038  | 34.03056   | -1.854449 | 0.750034 | NADPH oxidase, Respiratory burst oxidase homolog, Ethylene-induced aerenchyma formation in roots under oxygen-deficient conditions (Os12t0541300-01)                                                                          |
| Os01g0835500 | 809.8171 | -0.17     | 0.999758 | 811.6179   | -0.187867 | 0.99986  | NADPH oxidase (Int. J. Mol. Sci. 2013, 14, 9440-9458; doi:10.3390/ijms14059440)                                                                                                                                               |
| Os05g0465800 | 8.33076  | 0.264029  | 0.999758 | 8.966565   | 0.445305  | 0.99986  | NADPH oxidase (Int. J. Mol. Sci. 2013, 14, 9440-9458; doi:10.3390/ijms14059440)                                                                                                                                               |
| Os08g0453700 | 317.9656 | -0.722887 | 0.729889 | 310.6306   | -0.841971 | 0.99986  | NADPH oxidase (Int. J. Mol. Sci. 2013, 14, 9440-9458; doi:10.3390/ijms14059440)                                                                                                                                               |
| Os09g0438000 | 525.1351 | -0.806681 | 0.460604 | 598.3608   | -0.362979 | 0.99986  | NADPH oxidase (Int. J. Mol. Sci. 2013, 14, 9440-9458; doi:10.3390/ijms14059440)                                                                                                                                               |
| Os11g0537400 | 87.26725 | -0.838328 | 0.868004 | 84.05682   | -1.025326 | 0.99986  | NADPH oxidase (Int. J. Mol. Sci. 2013, 14, 9440-9458; doi:10.3390/ijms14059440)                                                                                                                                               |
