# Supplementary material for: Effects of LPS from Rhodobacter sphaeroides, a Purple Non-Sulfur Bacterium (PNSB), on the Gene Expression of Rice Root
Source: MDPI journal article supplement (doi:10.3390/microorganisms11071676), 2023-06-28
Supplement: s1 [file s1]

Table S2 List of 36 JA signaling pathway related genes

| LPS          |          |          |          | Dead cells |          |          |                                                                                                                                                                                               |
|--------------|----------|----------|----------|------------|----------|----------|-----------------------------------------------------------------------------------------------------------------------------------------------------------------------------------------------|
| GeneID       | baseMean | logFC    | padj     | baseMean   | logFC    | padj     | Description                                                                                                                                                                                   |
| Os03g0180900 | 331.6668 | 3.088268 | 9.08E-24 | 198.588    | 2.21663  | 1.03E-10 | Jasmonate ZIM-domain containing protein, Transcriptional repressor of JA signaling, Regulation of phosphate starvation responses, Pi homeostasis (Os03t0180900-01)                            |
| Os05g0586200 | 5241.215 | 2.528499 | 6.41E-23 | 2774.058   | 1.35187  | 2.88E-06 | Gretchen hagen 3 (GH3) family protein, Phytochrome, Jasmonyl-L-isoleucine synthase, Jasmonate signaling, Wound response, Response to blast infection (Os05t0586200-01)                        |
| Os09g0439200 | 327.6254 | 1.9726   | 2.56E-17 | 225.7917   | 1.242014 | 9.78E-05 | Jasmonate ZIM-domain protein, Jasmonate-induced resistance to bacterial blight, Repressor of jasmonic acid signaling (Os09t0439200-01)                                                        |
| Os11g0684000 | 133.8181 | 3.246165 | 3.99E-13 | 56.33285   | 1.756915 | 0.003497 | Myb transcription factor, Jasmonate-dependent defense response, Negative regulation of bacterial blight resistance (Os11t0684000-01)                                                          |
| Os10g0391400 | 32.8428  | 1.871914 | 0.246463 | 53.39051   | 2.702588 | 0.008779 | Jasmonate ZIM-domain (JAZ) protein, TIFY family protein, Negative regulation of JA signal transduction pathway, Activation of hypersensitive cell death (Os10t0391400-01)                     |
| Os07g0153000 | 12.12568 | 3.511223 | 0.027326 | 12.04041   | 3.484357 | 0.036289 | A member of the JASMONATE ZIM-domain (JAZ) family (Os07t0153000-01)                                                                                                                           |
| Os03g0402800 | 2106.674 | 1.712575 | 1.06E-11 | 1420.237   | 0.894661 | 0.038213 | TIFY family protein, JASMONATE-ZIM domain (JAZ) protein, JA signaling, Regulation of spikelet development (Os03t0402800-01);Similar to ZIM motif family protein, expressed. (Os03t0402800-02) |
| Os09g0401300 | 2417.472 | 1.452998 | 2.13E-19 | 1618.989   | 0.568303 | 0.040984 | A member of the JASMONATE ZIM-domain (JAZ)                                                                                                                                                    |

|              |          |           |          |          |           |          |                                                                                                                                                                                                                                              |
|--------------|----------|-----------|----------|----------|-----------|----------|----------------------------------------------------------------------------------------------------------------------------------------------------------------------------------------------------------------------------------------------|
|              |          |           |          |          |           |          | family, Negative modulation of JA signaling and antiviral defense (Os09t0401300-01);Similar to ZIM motif family protein. (Os09t0401300-02);Similar to ZIM motif family protein. (Os09t0401300-03)                                            |
| Os04g0301500 | 35.6641  | 8.635412  | 1.38E-08 | 2.722173 | 4.910923  | 0.733147 | Basic helix-loop-helix transcription activator, Control of disease resistance, Regulation of salicylic acid (SA) and jasmonic acid (JA) signaling (Os04t0301500-01)                                                                          |
| Os01g0221100 | 14.2594  | -1.327714 | 0.836536 | 14.59437 | -1.239343 | 0.99986  | Jasmonyl-L-isoleucine synthase, Wound response, Jasmonic acid signalling (Os01t0221100-01);GH3 auxin-responsive promoter family protein. (Os01t0221100-02)                                                                                   |
| Os03g0265500 | 967.4581 | 0.191417  | 0.999758 | 909.7759 | -0.002955 | 0.99986  | COII homolog, Jasmonate signaling (Os03t0265500-01);Similar to Coronatine-insensitive 1. (Os03t0265500-02)                                                                                                                                   |
| Os04g0653000 | 6158.263 | 0.669641  | 0.013931 | 5386.171 | 0.318287  | 0.99986  | Jasmonic acid (JA) signalling repressor, Regulation of spikelet development (Os04t0653000-01)                                                                                                                                                |
| Os05g0143600 | 0.473559 | 0.871852  | 0.999758 | 0.891452 | 2.04278   | 0.99986  | Similar to Jasmonate-induced protein. (Os05t0143600-01)                                                                                                                                                                                      |
| Os10g0132300 | 2538.243 | -0.068078 | 0.999758 | 2638.813 | 0.019928  | 0.99986  | Similar to Jasmonate-induced protein. (Os10t0132300-01)                                                                                                                                                                                      |
| Os11g0446000 | 190.4762 | -1.049146 | 0.719468 | 187.7582 | -1.14172  | 0.99986  | Conserved hypothetical protein. (Os11t0446000-01);Nuclear protein homologous to the regulatory domain of the R/B-like bHLH transcription factors, Regulation of jasmonate-induced gene expression and root cell elongation (Os11t0446000-02) |
| Os12g0144200 | 6.203599 | 2.757408  | 0.334296 | 5.02001  | 2.386029  | 0.99986  | Similar to Jasmonate-induced protein. (Os12t0144200-00)                                                                                                                                                                                      |
| Os12g0198700 | 12.75082 | 0.067676  | 0.999758 | 14.85312 | 0.456647  | 0.99986  | Similar to Jasmonate-induced protein. (Os12t0198700-01)                                                                                                                                                                                      |
| Os03g0119966 | 129.6068 | 0.101829  | 0.999758 | 126.889  | 0.014312  | 0.99986  | NAC-domain protein, Resistance to rice dwarf virus, Regulator of                                                                                                                                                                             |

|              |          |           |          |          |           |         |                                                                                                                                                                                   |
|--------------|----------|-----------|----------|----------|-----------|---------|-----------------------------------------------------------------------------------------------------------------------------------------------------------------------------------|
|              |          |           |          |          |           |         | jasmonate (JA) signaling (Os03t0119966-01)                                                                                                                                        |
| Os02g0559400 | 203.9827 | 0.030942  | 0.999758 | 214.3766 | 0.147087  | 0.99986 | 12-oxophytodienoic acid reductase (EC:1.3.1.-), Jasmonic acid (JA)-mediated defense signaling (Os02t0559400-01);Similar to 12-oxo-phytodienoic acid reductase5. (Os02t0559400-02) |
| Os06g0216300 | 5143.767 | 0.468807  | 0.270774 | 4817.961 | 0.280539  | 0.99986 | Similar to 12-oxophytodienoic acid reductase. (Os06t0216300-01);12-oxophytodienoic acid reductase 1, Jasmonic acid (JA) biosynthesis, Defense response (Os06t0216300-02)          |
| Os08g0459600 | 2389.871 | 0.448955  | 0.228751 | 2230.917 | 0.251335  | 0.99986 | 12-oxophytodienoate reductase (EC:1.3.1.42), Jasmonic acid (JA) biosynthesis (Os08t0459600-01)                                                                                    |
| Os02g0218700 | 0.488675 | 0.871852  | 0.999758 | 0.173578 | -0.910699 | 0.99986 | Allene oxide synthase (CYP74A3), Fatty acid 9-/13-hydroperoxide lyase (CYP74C), Biosynthesis of jasmonic acid (JA), Plant defense (Os02t0218700-01)                               |
| Os02g0218800 | 974.2635 | -0.573114 | 0.989443 | 948.499  | -0.695472 | 0.99986 | Allene oxide synthase (CYP74A4), Fatty acid 9-/13-hydroperoxide lyase (CYP74C), Biosynthesis of jasmonic acid (JA), Plant defense (Os02t0218800-01)                               |
| Os03g0767000 | 166.6354 | 1.067698  | 0.560411 | 118.5652 | 0.250317  | 0.99986 | Allene oxide synthase (CYP74A1), Biosynthesis of jasmonic acid (JA) (Os03t0767000-01)                                                                                             |
| Os05g0375400 | 5227.694 | -1.127354 | 0.484538 | 5071.326 | -1.301653 | 0.99986 | Endo-(1,3;1,4)-&beta;-glucanase, "Response to wounding, methyl jasmonate, abscisic acid and ethephon" (Os05t0375400-01)                                                           |
| Os03g0300400 | 9281.074 | -0.054414 | 0.999758 | 9995.171 | 0.132007  | 0.99986 | Jasmonate inducible pathogenesis-related class 10 protein, Self-defense against biotic and abiotic stresses (Os03t0300400-01)                                                     |
| Os03g0225900 | 9.766175 | 1.038629  | 0.996501 | 8.744091 | 0.773251  | 0.99986 | Allene oxide synthase (CYP74A2), Biosynthesis of jasmonic acid (JA)                                                                                                               |

|              |          |           |          |          |           |         |                                                                                                                                                                                                                                                                                              |
|--------------|----------|-----------|----------|----------|-----------|---------|----------------------------------------------------------------------------------------------------------------------------------------------------------------------------------------------------------------------------------------------------------------------------------------------|
|              |          |           |          |          |           |         | (Os03t0225900-01);Allene oxide synthase.<br>(Os03t0225900-02)                                                                                                                                                                                                                                |
| Os07g0247100 | 166.3662 | 0.048609  | 0.999758 | 161.1097 | -0.069787 | 0.99986 | Chloroplast-localised putative leucine carboxyl methyltransferase (LCMT), O-methyltransferase, Regulation of jasmonate (JA)- and brassinosteroid (BR)-mediated growth and defence responses, Leaf senescence, heading date and grain production via melatonin biosynthesis (Os07t0247100-01) |
| Os01g0853400 | 805.5175 | -0.421146 | 0.999758 | 886.3519 | -0.137105 | 0.99986 | Component of the SCF E3 ubiquitin ligase complex, Jasmonate-regulated defense responses, Promoting leaf senescence (Os01t0853400-01)                                                                                                                                                         |
| Os01g0900400 | 0.948696 | -3.336362 | 0.999758 | 2.454627 | 0.629917  | 0.99986 | Putative triacylglycerol (TAG) lipase, Phospholipase A1, Specification of empty-glume identity, Regulation of spikelet development, Endogenous jasmonic acid (JA) biosynthesis (Os01t0900400-01)                                                                                             |
| Os03g0438100 | 2675.702 | 0.952432  | 0.289824 | 2182.055 | 0.461152  | 0.99986 | Allene oxide cyclase, Biosynthesis of jasmonic acid, Defence response (Os03t0438100-01);Similar to Allene oxide cyclase precursor (EC 5.3.99.6) (Allene oxide cyclase). (Os03t0438100-02)                                                                                                    |
| Os05g0102000 | 3.354277 | 1.302677  | 0.999758 | 3.326359 | 1.271619  | 0.99986 | Jasmonic acid carboxyl methyltransferase, Regulation of plant development and herbivory-induced defense response, Resistance to brown planthopper (BPH) (Os05t0102000-01)                                                                                                                    |
| Os05g0449500 | 983.6981 | -0.882955 | 0.398254 | 1058.755 | -0.624761 | 0.99986 | Component of the SCF E3 ubiquitin ligase complex, Jasmonate-regulated defense responses, Regulation of leaf senescence (Os05t0449500-01)                                                                                                                                                     |

|              |          |           |          |          |           |         |                                                                                                                                                                                                                                                                                                                                                                                                                                                                      |
|--------------|----------|-----------|----------|----------|-----------|---------|----------------------------------------------------------------------------------------------------------------------------------------------------------------------------------------------------------------------------------------------------------------------------------------------------------------------------------------------------------------------------------------------------------------------------------------------------------------------|
| Os06g0551400 | 2227.199 | 0.087112  | 0.999758 | 2153.191 | -0.033424 | 0.99986 | Ras-related small GTP-binding protein, Regulation of vesicular trafficking from trans-Golgi network to plasma membrane or vacuole, Jasmonic acid (JA)-mediated defense signaling (Os06t0551400-01)                                                                                                                                                                                                                                                                   |
| Os08g0500100 | 1760.003 | 0.060103  | 0.999758 | 1803.824 | 0.10587   | 0.99986 | Peroxisomal targeting sequence1 (PTS1) receptor protein, Type I peroxisomal targeting signal (PTS1) receptor, Regulation of spikelet development, Modulation of jasmonic acid biosynthesis, Antifungal activity (Os08t0500100-01); Peroxisomal targeting sequence1 (PTS1) receptor protein, Type I peroxisomal targeting signal (PTS1) receptor, Regulation of spikelet development, Modulation of jasmonic acid biosynthesis, Antifungal activity (Os08t0500100-02) |
| Os10g0575000 | 231.9871 | -0.264034 | 0.999758 | 232.7841 | -0.275863 | 0.99986 | JAZ-interacting transcription factor, Positive regulator of jasmonate (JA) signaling pathway, Bacterial blight resistance, Spikelet development (Os10t0575000-01)                                                                                                                                                                                                                                                                                                    |
