# Supplementary material for: Effects of LPS from Rhodobacter sphaeroides, a Purple Non-Sulfur Bacterium (PNSB), on the Gene Expression of Rice Root
Source: MDPI journal article supplement (doi:10.3390/microorganisms11071676), 2023-06-28
Supplement: s1 [file s1]

Table S1: List of up-regulated (361 genes) and down-regulated (93 genes) in Figure 2 which showed  $\text{Padj} < 0.05$  values in LPS or dead cells

|              |          | LPS      |          |  |          | Dead cells |          |                                                                                                                                                                     |
|--------------|----------|----------|----------|--|----------|------------|----------|---------------------------------------------------------------------------------------------------------------------------------------------------------------------|
| GeneID       | baseMean | logFC    | padj     |  | baseMean | logFC      | padj     | Description                                                                                                                                                         |
| Os06g0509900 | 145.7244 | 10.66506 | 0.224223 |  | 134.6966 | 10.54096   | 8.05E-12 | Similar to Thionin. (Os06t0509900-00)                                                                                                                               |
| Os06g0514100 | 540.935  | 6.167816 | 0.000708 |  | 1697.784 | 7.817175   | 3.08E-58 | Thionin, Antimicrobial peptide, Defence against root pathogens (Os06t0514100-01)                                                                                    |
| Os06g0513050 | 245.2583 | 6.14879  | 0.022096 |  | 504.7763 | 7.190397   | 5.42E-05 | Conserved hypothetical protein. (Os06t0513050-01)                                                                                                                   |
| Os06g0514800 | 20.18003 | 6.839652 | 0.360485 |  | 20.41284 | 6.845489   | 0.008779 | Conserved hypothetical protein. (Os06t0514800-00)                                                                                                                   |
| Os07g0598000 | 3.231603 | 4.141562 | 0.601321 |  | 9.072041 | 5.662006   | 0.027534 | Similar to NADPH HC toxin reductase (Fragment). (Os07t0598000-01); Similar to NADPH HC toxin reductase (Fragment). (Os07t0598000-02)                                |
| Os10g0177300 | 20.56308 | 5.378024 | 0.006105 |  | 19.48063 | 5.280179   | 0.000234 | Similar to Chalcone and stilbene synthases, N-terminal domain containing protein. (Os10t0177300-00)                                                                 |
| Os04g0301500 | 35.6641  | 8.635412 | 1.38E-08 |  | 2.722173 | 4.910923   | 0.733147 | Basic helix-loop-helix transcription activator, Control of disease resistance, Regulation of salicylic acid (SA) and jasmonic acid (JA) signaling (Os04t0301500-01) |
| Os11g0529036 | 5.914962 | 4.123683 | 0.400558 |  | 9.592993 | 4.830888   | 0.032533 | Similar to Chalcone and stilbene synthases, N-terminal domain containing protein. (Os11t0529036-00)                                                                 |
| Os03g0775000 | 6.90568  | 6.267757 | 0.004244 |  | 2.021591 | 4.482249   | 0.99986  | Leucine carboxyl methyltransferase domain containing protein. (Os03t0775000-00)                                                                                     |
| Os02g0660800 | 60.85066 | 4.260407 | 0.00217  |  | 69.33689 | 4.454243   | 3.76E-06 | Similar to OSIGBa0143N19.7 protein. (Os02t0660800-00)                                                                                                               |
| Os11g0529150 | 11.64419 | 3.489763 | 0.449995 |  | 21.26108 | 4.388404   | 0.000831 | Hypothetical gene. (Os11t0529150-00)                                                                                                                                |
| Os08g0391300 | 7.937672 | 0.630756 | 0.999758 |  | 66.00371 | 4.317732   | 0.034023 | Conserved hypothetical protein. (Os08t0391300-01)                                                                                                                   |
| Os11g0603000 | 34.34896 | 4.335305 | 0.009762 |  | 30.93995 | 4.167615   | 1.15E-05 | Basic helix-loop-helix dimerisation region bHLH domain containing protein. (Os11t0603000-01)                                                                        |
| Os09g0555100 | 15.68343 | 1.913631 | 0.350689 |  | 58.61428 | 4.059376   | 0.009341 | Similar to auxin Efflux Carrier family protein. (Os09t0555100-00)                                                                                                   |
| Os03g0183500 | 262.0588 | 4.540899 | 1.12E-17 |  | 170.742  | 3.877031   | 3.24E-18 | Protein of unknown function DUF581 family protein. (Os03t0183500-01)                                                                                                |
| Os04g0395800 | 20.43898 | 5.360582 | 1.80E-05 |  | 6.817476 | 3.704647   | 0.390874 | Tify domain containing protein. (Os04t0395800-01)                                                                                                                   |

|              |          |          |          |  |          |          |          |                                                                                                     |
|--------------|----------|----------|----------|--|----------|----------|----------|-----------------------------------------------------------------------------------------------------|
| Os11g0529100 | 11.7402  | 3.229448 | 0.484836 |  | 15.45315 | 3.649044 | 0.009083 | Similar to Chalcone and stilbene synthases, N-terminal domain containing protein. (Os11t0529100-00) |
| Os09g0564700 | 9.991928 | 2.350171 | 0.333665 |  | 21.54557 | 3.584177 | 0.026551 | Similar to Vignain. (Os09t0564700-00)                                                               |
| Os03g0142600 | 165.3476 | 3.103949 | 3.48E-08 |  | 216.6871 | 3.520073 | 3.53E-07 | Myb transcription factor domain containing protein. (Os03t0142600-00)                               |
| Os07g0153000 | 12.12568 | 3.511223 | 0.027326 |  | 12.04041 | 3.484357 | 0.036289 | A member of the JASMONATE ZIM-domain (JAZ) family (Os07t0153000-01)                                 |
| Os01g0225500 | 67.66576 | 2.846403 | 0.03962  |  | 100.5874 | 3.470761 | 0.000155 | Similar to 3-methyl-2-oxobutanoate hydroxymethyltransferase. (Os01t0225500-00)                      |
| Os12g0637400 | 8.856377 | 5.636611 | 0.007238 |  | 2.089709 | 3.444348 | 0.99986  | Similar to Purple acid phosphatase (EC 3.1.3.2) (Fragment). (Os12t0637400-01)                       |
| Os10g0167900 | 142.3608 | 3.308983 | 0.369027 |  | 141.2312 | 3.285438 | 7.17E-05 | Type III polyketide synthase (Os10t0167900-01)                                                      |
| Os10g0168000 | 109.2667 | 3.23644  | 0.461468 |  | 113.2672 | 3.283287 | 0.001065 | Hypothetical protein. (Os10t0168000-00)                                                             |
| Os04g0639000 | 236.7125 | 2.771907 | 3.41E-05 |  | 313.1046 | 3.212986 | 4.01E-08 | Conserved hypothetical protein. (Os04t0639000-01)                                                   |
| Os10g0491400 | 5.260096 | 1.827946 | 0.78023  |  | 11.87423 | 3.208487 | 0.030932 | Conserved hypothetical protein. (Os10t0491400-01)                                                   |
| Os10g0168200 | 20.11112 | 2.655962 | 0.244387 |  | 27.29048 | 3.144711 | 0.000234 | Hypothetical protein. (Os10t0168200-00)                                                             |
| Os06g0513781 | 164.5254 | 3.41285  | 0.002934 |  | 135.2173 | 3.088939 | 0.000536 | Conserved hypothetical protein. (Os06t0513781-01)                                                   |
| Os07g0120000 | 73.49564 | 2.56785  | 0.065419 |  | 92.82308 | 2.945418 | 2.13E-11 | Similar to predicted protein. (Os07t0120000-00)                                                     |
| Os10g0118200 | 28.11392 | 3.082736 | 0.005669 |  | 26.01849 | 2.944923 | 0.040491 | Conserved hypothetical protein. (Os10t0118200-01)                                                   |
| Os12g0168150 | 6.295954 | 6.136194 | 0.015263 |  | 0.683318 | 2.9155   | 0.99986  | Hypothetical gene. (Os12t0168150-00)                                                                |
| Os10g0162842 | 66.98586 | 1.538506 | 0.260163 |  | 145.618  | 2.89232  | 0.003971 | Hypothetical protein. (Os10t0162842-00)                                                             |
| Os03g0289800 | 7.163347 | 5.324345 | 0.027326 |  | 1.438005 | 2.84957  | 0.99986  | Similar to Leucoanthocyanidin dioxygenase-like protein. (Os03t0289800-01)                           |
| Os12g0168100 | 7.819754 | 6.44827  | 0.004223 |  | 0.648174 | 2.846688 | 0.99986  | Similar to AP2 domain containing protein RAP2.6 (Fragment). (Os12t0168100-01)                       |
| Os10g0168300 | 21.23668 | 2.373493 | 0.346504 |  | 28.21588 | 2.843561 | 0.001305 | Similar to Chalcone and stilbene synthases, N-terminal domain containing protein. (Os10t0168300-00) |
| Os05g0212750 | 24.44717 | 2.444948 | 0.460604 |  | 30.53797 | 2.814692 | 0.002602 | Hypothetical protein. (Os05t0212750-00)                                                             |
| Os09g0341600 | 13.67648 | 2.880231 | 0.088865 |  | 13.05354 | 2.793653 | 0.028628 | Cyclin-like F-box domain containing protein. (Os09t0341600-01)                                      |
| Os03g0181100 | 291.8159 | 2.923655 | 2.95E-09 |  | 268.5558 | 2.775337 | 1.14E-09 | Tify domain containing protein. (Os03t0181100-01);Tify domain containing protein. (Os03t0181100-02) |

|              |          |          |          |  |          |          |          |                                                                                                                                                                           |
|--------------|----------|----------|----------|--|----------|----------|----------|---------------------------------------------------------------------------------------------------------------------------------------------------------------------------|
| Os10g0162844 | 28.07211 | 1.851915 | 0.114678 |  | 47.67225 | 2.758703 | 0.012208 | Wall-associated kinase domain containing protein. (Os10t0162844-00)                                                                                                       |
| Os05g0161500 | 137.5747 | 2.731663 | 0.000359 |  | 140.2078 | 2.750859 | 2.90E-05 | Calcium-activated (p)ppGpp synthetase, Ca <sup>2+</sup> -activated RelA-SpoT homolog 2 (Os05t0161500-01)                                                                  |
| Os01g0946600 | 138.1034 | 3.645301 | 2.38E-08 |  | 79.21109 | 2.744144 | 7.62E-06 | Conserved hypothetical protein. (Os01t0946600-01)                                                                                                                         |
| Os10g0391400 | 32.8428  | 1.871914 | 0.246463 |  | 53.39051 | 2.702588 | 0.008779 | Jasmonate ZIM-domain (JAZ) protein, TIFY family protein, Negative regulation of JA signal transduction pathway, Activation of hypersensitive cell death (Os10t0391400-01) |
| Os03g0741100 | 163.404  | 3.289899 | 2.13E-11 |  | 112.4932 | 2.667015 | 3.76E-06 | Basic helix-loop-helix transcription factor, Drought tolerance (Os03t0741100-01)                                                                                          |
| Os10g0118100 | 13.56098 | 2.85507  | 0.037338 |  | 11.99782 | 2.639255 | 0.514567 | Conserved hypothetical protein. (Os10t0118100-01)                                                                                                                         |
| Os06g0109200 | 11.11813 | 1.477569 | 0.597481 |  | 20.55069 | 2.576812 | 0.02197  | Protein of unknown function DUF6, transmembrane domain containing protein. (Os06t0109200-01)                                                                              |
| Os02g0137700 | 106.938  | 4.249741 | 5.47E-20 |  | 36.42171 | 2.526501 | 8.27E-05 | NAD(P)-binding domain containing protein. (Os02t0137700-01)                                                                                                               |
| Os03g0676400 | 18.48885 | 4.793311 | 0.000597 |  | 4.295592 | 2.509053 | 0.99986  | VQ domain containing protein. (Os03t0676400-01)                                                                                                                           |
| Os03g0860100 | 34.4903  | 5.358573 | 4.34E-06 |  | 5.402358 | 2.461769 | 0.99986  | Ethylene response factor, Transcriptional activator, Positive regulation of disease resistance (Os03t0860100-01)                                                          |
| Os12g0478400 | 30.34482 | 2.903697 | 0.000493 |  | 23.49573 | 2.461725 | 0.01565  | EGF-type aspartate/asparagine hydroxylation site domain containing protein. (Os12t0478400-00)                                                                             |
| Os10g0392900 | 20.5331  | 2.41382  | 0.137947 |  | 21.09932 | 2.447375 | 0.010813 | Similar to esterase. (Os10t0392900-00)                                                                                                                                    |
| Os05g0583000 | 12.01636 | 4.127675 | 0.003429 |  | 4.162439 | 2.413288 | 0.99986  | Similar to WRKY8. (Os05t0583000-01)                                                                                                                                       |
| Os12g0227500 | 2569.799 | 2.403028 | 0.282644 |  | 2600.735 | 2.411373 | 1.60E-06 | Similar to Beta-glucosidase aggregating factor. (Os12t0227500-00)                                                                                                         |
| Os11g0644800 | 29.51209 | 2.739957 | 0.002404 |  | 24.04353 | 2.387545 | 0.290911 | Similar to Tyrosine/nicotianamine aminotransferases family protein, expressed. (Os11t0644800-00)                                                                          |
| Os12g0227766 | 2180.561 | 2.401842 | 0.285221 |  | 2105.635 | 2.329435 | 2.90E-05 | Hypothetical protein. (Os12t0227766-00)                                                                                                                                   |
| Os12g0228650 | 18.65771 | 2.014523 | 0.140568 |  | 22.27868 | 2.305493 | 0.040984 | Hypothetical protein. (Os12t0228650-00)                                                                                                                                   |
| Os10g0137300 | 35.17102 | 3.301571 | 0.016986 |  | 19.24092 | 2.297433 | 0.524656 | Similar to BLN1-1. (Os10t0137300-00)                                                                                                                                      |
| Os07g0115800 | 24.46876 | 3.284894 | 0.007877 |  | 13.32652 | 2.273327 | 0.99986  | Hypothetical conserved gene. (Os07t0115800-00)                                                                                                                            |

|              |          |          |          |  |          |          |          |                                                                                                                                                                                                                                        |
|--------------|----------|----------|----------|--|----------|----------|----------|----------------------------------------------------------------------------------------------------------------------------------------------------------------------------------------------------------------------------------------|
| Os06g0513943 | 1359.001 | 2.182834 | 0.404807 |  | 1401.433 | 2.224408 | 4.37E-05 | Conserved hypothetical protein. (Os06t0513943-01)                                                                                                                                                                                      |
| Os03g0180900 | 331.6668 | 3.088268 | 9.08E-24 |  | 198.588  | 2.21663  | 1.03E-10 | Jasmonate ZIM-domain containing protein, Transcriptional repressor of JA signaling, Regulation of phosphate starvation responses, Pi homeostasis (Os03t0180900-01)                                                                     |
| Os10g0113100 | 1016.464 | 1.757625 | 0.692848 |  | 1306.677 | 2.200757 | 0.043516 | Aldo/keto reductase family protein. (Os10t0113100-01);Similar to cDNA clone:J033143K18, full insert sequence. (Os10t0113100-02)                                                                                                        |
| Os02g0807900 | 99.01305 | 2.688626 | 3.28E-05 |  | 75.02591 | 2.198776 | 0.003818 | Conserved hypothetical protein. (Os02t0807900-01)                                                                                                                                                                                      |
| Os02g0511400 | 53.33668 | 1.798356 | 0.216643 |  | 65.17316 | 2.149353 | 0.023556 | Glucose/ribitol dehydrogenase family protein. (Os02t0511400-01)                                                                                                                                                                        |
| Os05g0213150 | 181.1879 | 1.814347 | 0.307055 |  | 219.3822 | 2.148826 | 0.028628 | Hypothetical protein. (Os05t0213150-00)                                                                                                                                                                                                |
| Os09g0409100 | 2088.919 | 1.238138 | 0.137947 |  | 3396.05  | 2.142564 | 8.27E-05 | Conserved hypothetical protein. (Os09t0409100-01)                                                                                                                                                                                      |
| Os09g0491238 | 1642.005 | 1.152621 | 0.148599 |  | 2758.923 | 2.126902 | 0.012181 | Hypothetical protein. (Os09t0491238-00)                                                                                                                                                                                                |
| Os09g0491100 | 1689.547 | 1.135144 | 0.153026 |  | 2855.319 | 2.122433 | 0.011316 | Similar to Beta-primeverosidase (EC 3.2.1.149). (Os09t0491100-01);Similar to Beta-glucosidase isozyme 2. (Os09t0491100-02);Similar to Beta-glucosidase 30. (Os09t0491100-03)                                                           |
| Os08g0190100 | 108.6669 | 2.376925 | 0.0434   |  | 94.34276 | 2.116151 | 9.78E-05 | Germin-like protein 8-11, Disease resistance (Os08t0190100-01)                                                                                                                                                                         |
| Os05g0212550 | 185.4298 | 1.771242 | 0.270877 |  | 222.3106 | 2.089353 | 4.10E-05 | Hypothetical protein. (Os05t0212550-00)                                                                                                                                                                                                |
| Os11g0260100 | 73.07886 | 2.861702 | 0.000152 |  | 46.60124 | 2.084384 | 0.127805 | SAM dependent carboxyl methyltransferase family protein. (Os11t0260100-00)                                                                                                                                                             |
| Os12g0503000 | 1154.661 | 2.080638 | 3.47E-11 |  | 1161.662 | 2.076525 | 0.001221 | Allantoin transporter, Ureide metabolism, Nitrogen molecular sensor (Os12t0503000-01);Similar to Ureide permease 4. (Os12t0503000-03);Similar to Ureide permease 4. (Os12t0503000-04);Similar to Allantoin permease. (Os12t0503000-05) |
| Os05g0586600 | 36.47537 | 3.708553 | 2.95E-09 |  | 13.44275 | 2.057107 | 0.285098 | Similar to SIGE (RNA polymerase sigma subunit E); DNA binding / DNA-directed RNA polymerase/ sigma factor/ transcription factor. (Os05t0586600-01);Potential plastid sigma factor of RNA polymerase (Os05t0586600-02)                  |
| Os05g0212900 | 351.6929 | 1.788267 | 0.184124 |  | 404.54   | 2.031264 | 9.78E-05 | Similar to Chalcone synthase J (EC 2.3.1.74) (Naringenin-chalcone                                                                                                                                                                      |

|              |          |          |          |  |          |          |                                                                                                                                                                                                                            |
|--------------|----------|----------|----------|--|----------|----------|----------------------------------------------------------------------------------------------------------------------------------------------------------------------------------------------------------------------------|
|              |          |          |          |  |          |          | synthase J).<br>(Os05t0212900-00)                                                                                                                                                                                          |
| Os04g0310100 | 121.0892 | 2.686539 | 0.00494  |  | 82.8673  | 2.020834 | 0.000731<br>Similar to H0211A12.12<br>protein. (Os04t0310100-01)                                                                                                                                                           |
| Os10g0392400 | 121.7733 | 3.55024  | 5.97E-16 |  | 48.48961 | 2.010127 | 0.000134<br>Tify domain containing<br>protein. (Os10t0392400-01)                                                                                                                                                           |
| Os05g0213000 | 308.45   | 1.706874 | 0.224223 |  | 363.5878 | 1.997103 | 5.61E-05<br>Hypothetical protein.<br>(Os05t0213000-00)                                                                                                                                                                     |
| Os02g0808000 | 80.88029 | 2.567922 | 0.000193 |  | 58.31905 | 1.981603 | 0.012676<br>Hypothetical protein.<br>(Os02t0808000-00)                                                                                                                                                                     |
| Os07g0118250 | 119.5568 | 1.803967 | 0.246463 |  | 132.111  | 1.975074 | 0.000263<br>Protein of unknown<br>function DUF538 family<br>protein. (Os07t0118250-00)                                                                                                                                     |
| Os01g0946700 | 1950.396 | 3.174279 | 1.11E-25 |  | 942.1311 | 1.927956 | 7.84E-09<br>Similar to Glucan endo-1,3-<br>beta-glucosidase GV (EC<br>3.2.1.39) ((1->3)-beta-<br>glucan endohydrolase GV)<br>((1->3)-beta-glucanase<br>isoenzyme GV) (Beta-1,3-<br>endoglucanase GV).<br>(Os01t0946700-01) |
| Os01g0124700 | 154.9147 | 3.044807 | 5.93E-09 |  | 81.15194 | 1.927938 | 0.013469<br>Hypothetical protein.<br>(Os01t0124700-01)                                                                                                                                                                     |
| Os12g0138800 | 193.4471 | 1.589112 | 0.022373 |  | 232.0921 | 1.915854 | 7.74E-05<br>Six-bladed beta-propeller,<br>TolB-like domain<br>containing protein.<br>(Os12t0138800-01)                                                                                                                     |
| Os04g0308500 | 777.3825 | 2.294857 | 0.008102 |  | 611.5267 | 1.852461 | 0.001221<br>Similar to H0211A12.12<br>protein. (Os04t0308500-01)                                                                                                                                                           |
| Os01g0124650 | 210.8575 | 2.909909 | 6.01E-10 |  | 114.4936 | 1.841667 | 0.003818<br>Hypothetical conserved<br>gene. (Os01t0124650-02)                                                                                                                                                              |
| Os04g0308400 | 771.9194 | 2.158627 | 0.023882 |  | 649.5043 | 1.832985 | 0.000234<br>Similar to H0211A12.13<br>protein. (Os04t0308400-00)                                                                                                                                                           |
| Os01g0544325 | 40.54163 | 0.94328  | 0.687763 |  | 63.38156 | 1.819564 | 0.043168<br>Non-protein coding<br>transcript. (Os01t0544325-<br>00)                                                                                                                                                        |
| Os06g0220900 | 134.9014 | 1.977139 | 0.000239 |  | 124.5506 | 1.815281 | 0.001118<br>Conserved hypothetical<br>protein. (Os06t0220900-00)                                                                                                                                                           |
| Os08g0200100 | 57.72844 | 1.99597  | 0.042362 |  | 51.68036 | 1.779964 | 0.057472<br>Ribonucleotide reductase-<br>related domain containing<br>protein. (Os08t0200100-01)                                                                                                                           |
| Os11g0684000 | 133.8181 | 3.246165 | 3.99E-13 |  | 56.33285 | 1.756915 | 0.003497<br>Myb transcription factor,<br>Jasmonate-dependent<br>defense response, Negative<br>regulation of bacterial<br>blight resistance<br>(Os11t0684000-01)                                                            |
| Os07g0178700 | 14.24146 | 4.386229 | 0.001291 |  | 2.859814 | 1.753591 | 0.99986<br>Similar to Low molecular<br>mass early light-inducible<br>protein HV90, chloroplast<br>precursor (ELIP).<br>(Os07t0178700-01)                                                                                   |
| Os04g0179100 | 20.69156 | 2.913673 | 0.004499 |  | 10.6468  | 1.740754 | 0.99986<br>Similar to<br>OSIGBa0109M01.2<br>protein. (Os04t0179100-01)                                                                                                                                                     |
| Os10g0530200 | 5378.922 | 1.411216 | 0.058112 |  | 6406.932 | 1.733029 | 9.69E-05<br>Similar to Glutathione S-<br>transferase TSI-1 (EC<br>2.5.1.18) (Glutathione S-<br>transferase 1).<br>(Os10t0530200-01)                                                                                        |
| Os05g0142100 | 100.6576 | 2.104719 | 0.000314 |  | 82.76498 | 1.732356 | 0.110708<br>Conserved hypothetical<br>protein. (Os05t0142100-01)                                                                                                                                                           |
| Os12g0548700 | 2665.511 | 1.348194 | 1.06E-07 |  | 3241.349 | 1.71253  | 0.028252<br>Similar to MPI.<br>(Os12t0548700-01)                                                                                                                                                                           |

|              |          |          |          |  |          |          |          |                                                                                                                                                         |
|--------------|----------|----------|----------|--|----------|----------|----------|---------------------------------------------------------------------------------------------------------------------------------------------------------|
| Os10g0185400 | 350.331  | 1.784001 | 0.006416 |  | 337.5935 | 1.703052 | 0.386439 | Pectinesterase inhibitor domain containing protein. (Os10t0185400-00)                                                                                   |
| Os11g0644650 | 291.6423 | 1.375818 | 0.001068 |  | 343.209  | 1.677596 | 0.004567 | Hypothetical protein. (Os11t0644650-01)                                                                                                                 |
| Os12g0548401 | 967.2015 | 1.579724 | 0.000345 |  | 1008.867 | 1.644882 | 0.030932 | Similar to Proteinase inhibitor. (Os12t0548401-01)                                                                                                      |
| Os04g0658200 | 15.00724 | 4.461199 | 0.000991 |  | 2.688215 | 1.620611 | 0.99986  | Similar to OSIGBa0132E09-OSIGBa0108L24.3 protein. (Os04t0658200-01)                                                                                     |
| Os11g0482901 | 166.6197 | 3.006514 | 1.01E-07 |  | 75.51282 | 1.617415 | 0.143504 | Hypothetical gene. (Os11t0482901-01)                                                                                                                    |
| Os05g0192100 | 274.0193 | 1.455036 | 0.017399 |  | 299.027  | 1.611734 | 0.193231 | Similar to Stem 28 kDa glycoprotein. (Os05t0192100-01)                                                                                                  |
| Os11g0644700 | 323.6633 | 1.29188  | 0.00494  |  | 382.2877 | 1.605161 | 0.005533 | Plant disease resistance response protein family protein. (Os11t0644700-01)                                                                             |
| Os04g0423400 | 62.74815 | 1.590147 | 0.004545 |  | 63.11072 | 1.587669 | 0.139634 | Similar to OSIGBa0076I14.3 protein. (Os04t0423400-01);Similar to OSIGBa0076I14.3 protein. (Os04t0423400-02)                                             |
| Os02g0626600 | 134.1023 | 2.276042 | 0.010634 |  | 92.35027 | 1.582588 | 0.227889 | Similar to Phenylalanine ammonia-lyase. (Os02t0626600-00)                                                                                               |
| Os03g0198600 | 219.6709 | 1.708285 | 0.015125 |  | 205.3844 | 1.564263 | 0.028811 | Homeodomain-leucine zipper transcription factor, Regulation of panicle exertion (Os03t0198600-01)                                                       |
| Os02g0181300 | 105.5535 | 1.747526 | 0.001667 |  | 96.58813 | 1.5627   | 0.027534 | WRKY transcription factor, Defense response (Os02t0181300-01)                                                                                           |
| Os01g0950000 | 215.2661 | 1.33919  | 0.176127 |  | 242.378  | 1.55905  | 0.046251 | Similar to Glutathione S-transferase GST 28 (EC 2.5.1.18) (Fragment). (Os01t0950000-01)                                                                 |
| Os02g0120100 | 74.82876 | 1.747322 | 0.006647 |  | 67.9993  | 1.550366 | 0.066661 | Serine/threonine/tyrosine protein kinase, STY kinase, Regulation of ammonium uptake (Os02t0120100-01);Similar to ATP binding protein. (Os02t0120100-02) |
| Os05g0142400 | 135.5088 | 1.903952 | 0.000133 |  | 113.1379 | 1.548941 | 0.000304 | Conserved hypothetical protein. (Os05t0142400-01)                                                                                                       |
| Os08g0298700 | 472.2201 | 1.618733 | 0.000142 |  | 457.3471 | 1.540536 | 0.06119  | Similar to male sterility protein 2. (Os08t0298700-01)                                                                                                  |
| Os04g0310200 | 55.55781 | 2.469738 | 0.043413 |  | 33.30797 | 1.535121 | 0.528152 | Similar to H0211A12.13 protein. (Os04t0310200-00)                                                                                                       |
| Os07g0475900 | 89.13859 | 1.500337 | 0.047046 |  | 90.86116 | 1.520335 | 0.003524 | ACT domain containing protein kinase (Os07t0475900-01)                                                                                                  |
| Os09g0455900 | 224.3523 | 1.177459 | 0.00225  |  | 267.6223 | 1.51855  | 0.30091  | Alpha/beta hydrolase fold-3 domain containing protein. (Os09t0455900-01)                                                                                |
| Os09g0455750 | 225.2901 | 1.157628 | 0.003469 |  | 270.3388 | 1.511591 | 0.310273 | Hypothetical protein. (Os09t0455750-00)                                                                                                                 |
| Os01g0108600 | 140.8411 | 1.761036 | 0.000994 |  | 124.5931 | 1.510845 | 0.005051 | Basic helix-loop-helix dimerisation region bHLH domain containing protein.                                                                              |

|              |          |          |          |  |          |          |                                                                                                                              |
|--------------|----------|----------|----------|--|----------|----------|------------------------------------------------------------------------------------------------------------------------------|
|              |          |          |          |  |          |          | (Os01t0108600-01);Hypothetical conserved gene. (Os01t0108600-02)                                                             |
| Os07g0138200 | 56.72313 | 1.373196 | 0.016134 |  | 61.31265 | 1.510033 | 0.009341 NAC transcription factor, ABA-induced leaf senescence and tillering (Os07t0138200-01)                               |
| Os07g0633400 | 129.8988 | 0.90104  | 0.029556 |  | 175.6041 | 1.509947 | 7.17E-05 IQ calmodulin-binding region domain containing protein. (Os07t0633400-01)                                           |
| Os01g0834900 | 580.74   | 2.668071 | 2.58E-18 |  | 304.8068 | 1.500377 | 2.43E-09 Hypothetical conserved gene. (Os01t0834900-01)                                                                      |
| Os01g0676800 | 72.93838 | 1.464308 | 0.003001 |  | 74.21375 | 1.482005 | 0.001124 Conserved hypothetical protein. (Os01t0676800-01)                                                                   |
| Os04g0690800 | 110.6094 | 1.461774 | 1.32E-05 |  | 112.4182 | 1.479365 | 0.106402 22-kDa Photosystem II protein, Photoprotection (Os04t0690800-01)                                                    |
| Os03g0399800 | 83.40023 | 2.149059 | 0.003513 |  | 58.37526 | 1.473456 | 0.857172 Mannose-binding lectin domain containing protein. (Os03t0399800-01)                                                 |
| Os09g0364800 | 43.11122 | 0.817815 | 0.395943 |  | 58.3359  | 1.441533 | 0.023656 Heavy metal transport/detoxification protein domain containing protein. (Os09t0364800-01)                           |
| Os07g0637700 | 284.4284 | 1.205589 | 0.037338 |  | 321.7928 | 1.438325 | 0.14426 Similar to Disease resistance-responsive family protein. (Os07t0637700-00)                                           |
| Os01g0186000 | 82.80743 | 4.716221 | 3.42E-09 |  | 11.20982 | 1.436235 | 0.99986 Similar to WRKY transcription factor 10. (Os01t0186000-01)                                                           |
| Os06g0166500 | 121.9138 | 1.157894 | 0.151604 |  | 140.3424 | 1.42739  | 0.046552 Aux/IAA protein, Mediation of abiotic stress tolerance, Drought and salt tolerance (Os06t0166500-01)                |
| Os07g0633450 | 78.66433 | 0.805189 | 0.292118 |  | 106.391  | 1.42587  | 0.006995 Hypothetical gene. (Os07t0633450-00)                                                                                |
| Os02g0654700 | 65.92097 | 2.687944 | 1.17E-05 |  | 32.55789 | 1.402385 | 0.506732 AP2/ERF family protein, Abiotic stress response (Os02t0654700-01)                                                   |
| Os01g0225600 | 58.51568 | 1.851216 | 0.036405 |  | 46.23088 | 1.387299 | 0.605994 Atypical 5C LEA (late embryogenesis abundant) protein, Multiple stress tolerance, Hg accumulation (Os01t0225600-01) |
| Os10g0133600 | 51.08793 | 1.227634 | 0.060382 |  | 55.53164 | 1.378618 | 0.013079 Protein kinase-like domain containing protein. (Os10t0133600-01)                                                    |
| Os01g0735500 | 34.8462  | 2.037651 | 0.014824 |  | 24.83668 | 1.377958 | 0.680029 Conserved hypothetical protein. (Os01t0735500-01)                                                                   |
| Os02g0612900 | 59.27481 | 2.05509  | 4.27E-05 |  | 41.44331 | 1.367909 | 0.657076 Similar to Temperature stress-induced lipocalin. (Os02t0612900-01)                                                  |
| Os01g0225550 | 60.26673 | 1.83611  | 0.027392 |  | 47.40293 | 1.362392 | 0.577112 Hypothetical gene. (Os01t0225550-01)                                                                                |
| Os10g0162856 | 419.6071 | 1.351509 | 0.337794 |  | 423.2235 | 1.354421 | 0.01565 Similar to Chalcone and stilbene synthases, N-terminal domain containing protein. (Os10t0162856-00)                  |
| Os05g0586200 | 5241.215 | 2.528499 | 6.41E-23 |  | 2774.058 | 1.35187  | 2.88E-06 Gretchen hagen 3 (GH3) family protein, Phytochrome, Jasmonyl-L-isoleucine synthase,                                 |

|              |          |          |          |  |          |          |                                                                                    |                                                                                                                                                                                                  |
|--------------|----------|----------|----------|--|----------|----------|------------------------------------------------------------------------------------|--------------------------------------------------------------------------------------------------------------------------------------------------------------------------------------------------|
|              |          |          |          |  |          |          | Jasmonate signaling, Wound response, Response to blast infection (Os05t0586200-01) |                                                                                                                                                                                                  |
| Os07g0142500 | 1157.284 | 0.601583 | 0.774524 |  | 1630.187 | 1.331203 | 0.018934                                                                           | Conserved hypothetical protein. (Os07t0142500-00)                                                                                                                                                |
| Os01g0370000 | 1007.306 | 1.139927 | 0.048896 |  | 1113.616 | 1.330914 | 0.000765                                                                           | NADH:flavin oxidoreductase/NADH oxidase, N-terminal domain containing protein. (Os01t0370000-01)                                                                                                 |
| Os10g0530800 | 2727.837 | 1.35023  | 6.54E-05 |  | 2712.204 | 1.323445 | 0.550198                                                                           | Hypothetical protein. (Os10t0530800-01)                                                                                                                                                          |
| Os08g0269700 | 202.1764 | 0.990668 | 0.303923 |  | 238.7445 | 1.322523 | 0.026551                                                                           | Conserved hypothetical protein. (Os08t0269700-01)                                                                                                                                                |
| Os12g0548501 | 1221.918 | 1.521365 | 5.93E-09 |  | 1111.879 | 1.318175 | 0.012181                                                                           | Similar to Cl2C. (Os12t0548501-01)                                                                                                                                                               |
| Os12g0267200 | 911.7223 | 1.457446 | 0.012883 |  | 857.409  | 1.317484 | 0.043168                                                                           | Cyclopropane-fatty-acyl-phospholipid synthase domain containing protein. (Os12t0267200-01)                                                                                                       |
| Os01g0735450 | 33.63243 | 1.976807 | 0.025256 |  | 24.05166 | 1.317315 | 0.707181                                                                           | Hypothetical protein. (Os01t0735450-01)                                                                                                                                                          |
| Os04g0125700 | 4052.017 | 1.995805 | 3.02E-09 |  | 2856.215 | 1.31584  | 0.050176                                                                           | Concanavalin A-like lectin/glucanase domain containing protein. (Os04t0125700-01)                                                                                                                |
| Os10g0530900 | 2686.734 | 1.330548 | 9.50E-05 |  | 2670.392 | 1.302944 | 0.565095                                                                           | Similar to Glutathione S-transferase GST 30 (EC 2.5.1.18). (Os10t0530900-01);Similar to cDNA clone:006-203-F02, full insert sequence. (Os10t0530900-03)                                          |
| Os09g0248900 | 1092.46  | 1.040919 | 0.001239 |  | 1247.767 | 1.300606 | 0.010361                                                                           | Myb/SANT-like domain domain containing protein. (Os09t0248900-01)                                                                                                                                |
| Os11g0483000 | 129.2512 | 2.771811 | 1.32E-05 |  | 57.49358 | 1.300403 | 0.772975                                                                           | Cytochrome P450, Oxidase, JA-mediated chilling tolerance (Os11t0483000-01)                                                                                                                       |
| Os04g0541700 | 151.4412 | 0.96619  | 0.070804 |  | 177.8026 | 1.287759 | 0.017252                                                                           | Similar to Homeobox-leucine zipper protein HOX22. (Os04t0541700-01);Homeodomain-leucine zipper (HD-Zip) protein, Transcription factor, ABA-mediated drought and salt tolerance (Os04t0541700-02) |
| Os11g0211800 | 386.2481 | 1.84628  | 0.030598 |  | 286.2187 | 1.249786 | 0.29644                                                                            | Cysteine-rich peptide, Short-chain peptide, ABA-dependent drought tolerance (Os11t0211800-01)                                                                                                    |
| Os05g0559316 | 569.8944 | 0.918748 | 0.000443 |  | 670.6357 | 1.247714 | 0.000263                                                                           | Hypothetical conserved gene. (Os05t0559316-00)                                                                                                                                                   |
| Os01g0621900 | 1962.705 | 1.297754 | 6.91E-07 |  | 1929.733 | 1.245842 | 0.001221                                                                           | Similar to OSIGBa0097P08.1 protein. (Os01t0621900-01);Similar to OSIGBa0097P08.1 protein. (Os01t0621900-02);Similar to OSIGBa0097P08.1 protein.                                                  |



|              |          |          |          |  |          |          |                                                                  |                                                                                                                                                                                     |
|--------------|----------|----------|----------|--|----------|----------|------------------------------------------------------------------|-------------------------------------------------------------------------------------------------------------------------------------------------------------------------------------|
|              |          |          |          |  |          |          | (Os01t0621900-03);Hypothetical conserved gene. (Os01t0621900-04) |                                                                                                                                                                                     |
| Os11g0141400 | 263.7348 | 1.117687 | 0.147048 |  | 282.1252 | 1.242501 | 0.042655                                                         | Similar to EF hand family protein, expressed. (Os11t0141400-01)                                                                                                                     |
| Os09g0439200 | 327.6254 | 1.9726   | 2.56E-17 |  | 225.7917 | 1.242014 | 9.78E-05                                                         | Jasmonate ZIM-domain protein, Jasmonate-induced resistance to bacterial blight, Repressor of jasmonic acid signaling (Os09t0439200-01)                                              |
| Os01g0882100 | 42.1682  | 2.823702 | 2.65E-05 |  | 17.61086 | 1.235354 | 0.99986                                                          | Hypothetical conserved gene. (Os01t0882100-00)                                                                                                                                      |
| Os01g0882000 | 72.17154 | 2.595911 | 1.53E-11 |  | 34.53042 | 1.229242 | 0.307071                                                         | Conserved hypothetical protein. (Os01t0882000-01)                                                                                                                                   |
| Os03g0815100 | 742.4602 | 1.653558 | 0.025451 |  | 600.2905 | 1.220644 | 0.850898                                                         | NAC-domain transcription factor, Response to infection by M. grisea, MeJA-mediated signaling pathway, Drought and salinitytolerance (Os03t0815100-01)                               |
| Os10g0179000 | 33.11016 | 1.550593 | 0.032002 |  | 28.21753 | 1.212581 | 0.681659                                                         | Hypothetical protein. (Os10t0179000-00)                                                                                                                                             |
| Os08g0502700 | 80.33446 | 2.620583 | 6.48E-06 |  | 37.31488 | 1.202513 | 0.991897                                                         | Pyridoxal phosphate-dependent transferase, major region, subdomain 1 domain containing protein. (Os08t0502700-01);Similar to serine--glyoxylate aminotransferase. (Os08t0502700-03) |
| Os08g0331900 | 51.0176  | 1.445682 | 0.011392 |  | 44.92469 | 1.172458 | 0.37864                                                          | Similar to Leucine Rich Repeat family protein, expressed. (Os08t0331900-01)                                                                                                         |
| Os12g0131400 | 202.2295 | 1.541704 | 0.00108  |  | 168.8343 | 1.163482 | 0.193231                                                         | Hypothetical conserved gene. (Os12t0131400-01)                                                                                                                                      |
| Os02g0204400 | 98.69614 | 2.250935 | 2.05E-10 |  | 55.63332 | 1.150763 | 0.358664                                                         | Similar to (6-4)DNA photolyase. (Os02t0204400-00)                                                                                                                                   |
| Os01g0124401 | 1971.418 | 1.629143 | 0.010467 |  | 1553.586 | 1.138935 | 0.681866                                                         | Similar to Bowman-Birk type bran trypsin inhibitor. (Os01t0124401-01)                                                                                                               |
| Os11g0521000 | 491.8229 | 0.455826 | 0.963275 |  | 668.6748 | 1.135779 | 0.043168                                                         | Lipase, GDSL domain containing protein. (Os11t0521000-01)                                                                                                                           |
| Os06g0231600 | 178.4934 | 1.529509 | 0.000158 |  | 147.7208 | 1.130514 | 0.011877                                                         | Similar to RING-H2 finger protein ATL1Q. (Os06t0231600-01)                                                                                                                          |
| Os06g0676400 | 139.6226 | 1.554623 | 0.000193 |  | 113.8858 | 1.12739  | 0.053763                                                         | Conserved hypothetical protein. (Os06t0676400-01)                                                                                                                                   |
| Os09g0494600 | 225.2639 | 1.559855 | 0.000771 |  | 182.247  | 1.11889  | 0.99986                                                          | Protein of unknown function DUF599 family protein. (Os09t0494600-01)                                                                                                                |
| Os11g0453900 | 17.49566 | 2.522598 | 0.016588 |  | 8.247856 | 1.115826 | 0.99986                                                          | Dehydrin RAB 16D. (Os11t0453900-01)                                                                                                                                                 |
| Os01g0314800 | 884.4457 | 1.315799 | 9.62E-09 |  | 808.0392 | 1.112824 | 0.021488                                                         | Late embryogenesis abundant protein 3 family protein. (Os01t0314800-01)                                                                                                             |
| Os01g0124100 | 171.2448 | 2.315065 | 0.000238 |  | 91.10612 | 1.11069  | 0.99986                                                          | Proteinase inhibitor I12, Bowman-Birk family protein. (Os01t0124100-01)                                                                                                             |

|              |          |          |          |  |          |          |          |                                                                                                                                                                                                                                        |
|--------------|----------|----------|----------|--|----------|----------|----------|----------------------------------------------------------------------------------------------------------------------------------------------------------------------------------------------------------------------------------------|
| Os08g0123833 | 86.8649  | 1.401437 | 0.033116 |  | 75.47129 | 1.099738 | 0.506732 | Hypothetical protein.<br>(Os08t0123833-00)                                                                                                                                                                                             |
| Os02g0753000 | 181.397  | 1.38956  | 0.000184 |  | 158.1441 | 1.090714 | 0.10327  | Similar to Trehalose-6-phosphate phosphatase.<br>(Os02t0753000-01)                                                                                                                                                                     |
| Os03g0603600 | 428.1729 | 0.624043 | 0.657955 |  | 528.0139 | 1.076033 | 0.001221 | PLC-like phosphodiesterase, TIM beta/alpha-barrel domain containing protein.<br>(Os03t0603600-01)                                                                                                                                      |
| Os10g0178800 | 116.8498 | 1.007915 | 0.031582 |  | 121.3929 | 1.070187 | 0.382144 | Hypothetical conserved gene. (Os10t0178800-01)                                                                                                                                                                                         |
| Os08g0545700 | 48.68747 | 2.220467 | 6.37E-06 |  | 26.81834 | 1.062813 | 0.807863 | Similar to TraB protein-related. (Os08t0545700-01)                                                                                                                                                                                     |
| Os12g0203200 | 3079.05  | 1.418943 | 4.33E-08 |  | 2604.446 | 1.057711 | 0.00174  | Conserved hypothetical protein. (Os12t0203200-01)                                                                                                                                                                                      |
| Os03g0439650 | 221.733  | 0.167892 | 0.999758 |  | 321.3189 | 1.037183 | 0.022998 | Hypothetical protein.<br>(Os03t0439650-00)                                                                                                                                                                                             |
| Os04g0119500 | 1945.285 | 1.971254 | 1.00E-15 |  | 1215.101 | 1.034401 | 0.000223 | Non-protein coding transcript. (Os04t0119500-01);Similar to Membrane related protein-like. (Os04t0119500-02);Similar to Membrane related protein-like. (Os04t0119500-03)                                                               |
| Os02g0643500 | 51.34919 | 2.084317 | 0.001527 |  | 29.92208 | 1.027223 | 0.99986  | Pentapeptide repeat containing protein.<br>(Os02t0643500-01)                                                                                                                                                                           |
| Os06g0112100 | 3763.765 | 1.172922 | 1.11E-06 |  | 3540.491 | 1.026504 | 0.015771 | Nucleoside phosphorylase, family 1 domain containing protein. (Os06t0112100-01)                                                                                                                                                        |
| Os06g0211200 | 310.0691 | 1.811606 | 0.000239 |  | 210.041  | 1.024118 | 0.705276 | bZIP transcription factor, Positive regulator of ABA signaling, Drought tolerance (Os06t0211200-01);Similar to Absciscic acid responsive elements-binding factor (ABA-responsive element binding protein 1) (AREB1). (Os06t0211200-02) |
| Os05g0126800 | 722.0634 | 1.153567 | 0.000449 |  | 682.0588 | 1.015715 | 0.003818 | Mss4-like domain containing protein.<br>(Os05t0126800-01)                                                                                                                                                                              |
| Os05g0183100 | 137.7012 | 1.965144 | 1.34E-06 |  | 84.96704 | 1.00054  | 0.255078 | WRKY transcription factor, Positive regulation of blast and bacteria blight resistance (Os05t0183100-01)                                                                                                                               |
| Os06g0661800 | 87.17808 | 1.235791 | 0.005726 |  | 78.63607 | 0.99946  | 0.293757 | Similar to Cryptochrome DASH, chloroplastic/mitochondrial. (Os06t0661800-01);Similar to Cryptochrome dash (Fragment). (Os06t0661800-02)                                                                                                |
| Os10g0542900 | 54.612   | 1.703479 | 0.037469 |  | 38.58645 | 0.990346 | 0.99986  | Similar to chitinase.<br>(Os10t0542900-01)                                                                                                                                                                                             |
| Os01g0609000 | 1166.829 | 0.739004 | 0.824453 |  | 1312.912 | 0.986047 | 0.026948 | Similar to Pleiotropic drug resistance protein 3.<br>(Os01t0609000-00)                                                                                                                                                                 |
| Os01g0850900 | 1080.86  | 2.846264 | 1.27E-16 |  | 396.256  | 0.985763 | 0.146737 | SOUL haem-binding protein domain containing                                                                                                                                                                                            |

|              |          |          |          |  |          |          |          |                                                                                                                                                                                               |
|--------------|----------|----------|----------|--|----------|----------|----------|-----------------------------------------------------------------------------------------------------------------------------------------------------------------------------------------------|
|              |          |          |          |  |          |          |          | protein. (Os01t0850900-01)                                                                                                                                                                    |
| Os05g0127500 | 202.5405 | 2.077347 | 0.001363 |  | 116.1204 | 0.979172 | 0.99986  | Similar to Leucoanthocyanidin dioxygenase-like protein. (Os05t0127500-01)                                                                                                                     |
| Os01g0812200 | 574.8128 | 0.548962 | 0.524124 |  | 695.749  | 0.968189 | 0.013174 | Cyclin-like F-box domain containing protein. (Os01t0812200-01)                                                                                                                                |
| Os11g0204800 | 63.6126  | 1.247383 | 0.028744 |  | 56.15712 | 0.966776 | 0.337668 | Similar to Wali7 protein (Fragment). (Os11t0204800-01)                                                                                                                                        |
| Os06g0725250 | 44.05354 | 2.771401 | 3.41E-05 |  | 16.67558 | 0.957214 | 0.99986  | Hypothetical protein. (Os06t0725250-00)                                                                                                                                                       |
| Os10g0105700 | 585.0974 | 0.984889 | 0.078847 |  | 577.6863 | 0.938248 | 0.009186 | Similar to predicted protein. (Os10t0105700-01)                                                                                                                                               |
| Os12g0227400 | 899.6997 | 0.48173  | 0.999758 |  | 1101.057 | 0.933368 | 0.000719 | Allyl alcohol dehydrogenase. (Os12t0227400-01)                                                                                                                                                |
| Os12g0227450 | 545.3734 | 0.442    | 0.999758 |  | 677.3953 | 0.93073  | 0.001221 | Non-protein coding transcript. (Os12t0227450-00)                                                                                                                                              |
| Os09g0442100 | 195.5158 | 1.348296 | 0.034272 |  | 160.9102 | 0.924201 | 0.565095 | Protein kinase, core domain containing protein. (Os09t0442100-01)                                                                                                                             |
| Os05g0497300 | 745.6506 | 1.600032 | 0.000616 |  | 537.9441 | 0.917078 | 0.955813 | Similar to Ethylene response factor 2. (Os05t0497300-01)                                                                                                                                      |
| Os11g0129000 | 1491.347 | 1.623784 | 4.42E-08 |  | 1062.615 | 0.913352 | 0.126059 | Similar to Transparent testa 12 protein. (Os11t0129000-00)                                                                                                                                    |
| Os11g0129101 | 1293.189 | 1.609335 | 1.65E-07 |  | 928.3013 | 0.913079 | 0.167376 | Non-protein coding transcript. (Os11t0129101-00)                                                                                                                                              |
| Os01g0608900 | 508.8851 | 0.45794  | 0.999758 |  | 620.9017 | 0.90654  | 0.033382 | Hypothetical gene. (Os01t0608900-01)                                                                                                                                                          |
| Os02g0683900 | 1342.877 | 1.27925  | 1.51E-05 |  | 1131.77  | 0.898168 | 0.02228  | Protein of unknown function DUF1084 family protein. (Os02t0683900-01);Similar to T5E21.3. (Os02t0683900-02)                                                                                   |
| Os03g0402800 | 2106.674 | 1.712575 | 1.06E-11 |  | 1420.237 | 0.894661 | 0.038213 | TIFY family protein, JASMONATE-ZIM domain (JAZ) protein, JA signaling, Regulation of spikelet development (Os03t0402800-01);Similar to ZIM motif family protein, expressed. (Os03t0402800-02) |
| Os01g0597600 | 18.52976 | 3.041464 | 0.042265 |  | 5.837059 | 0.892065 | 0.99986  | Amino acid transporter, transmembrane domain containing protein. (Os01t0597600-01)                                                                                                            |
| Os03g0176700 | 71.32945 | 2.032648 | 1.04E-05 |  | 40.1824  | 0.878626 | 0.99986  | Conserved hypothetical protein. (Os03t0176700-00)                                                                                                                                             |
| Os05g0149400 | 312.7602 | 3.008296 | 0.001745 |  | 98.4824  | 0.874146 | 0.99986  | ACC oxidase, Ethylene biosynthesis (Os05t0149400-01)                                                                                                                                          |
| Os05g0497200 | 80.53069 | 1.823125 | 0.047708 |  | 49.92598 | 0.845657 | 0.99986  | AP2/ERF (APETALA2/ethylene-responsive factor) protein, Regulation of spikelet meristem determinancy and                                                                                       |

|              |          |          |          |  |          |          |                                                                                                                                                                                                          |
|--------------|----------|----------|----------|--|----------|----------|----------------------------------------------------------------------------------------------------------------------------------------------------------------------------------------------------------|
|              |          |          |          |  |          |          | floral organ identity (Os05t0497200-01)                                                                                                                                                                  |
| Os12g0626400 | 339.7449 | 0.815514 | 0.025451 |  | 346.0681 | 0.839243 | 0.030932<br>Similar to Phytoene synthase 1, chloroplast precursor (EC 2.5.1.-) (Fruit ripening specific protein pTOM5). (Os12t0626400-01);Phytoene synthase 2, Carotenoid biosynthesis (Os12t0626400-02) |
| Os03g0308800 | 127.0419 | 1.957101 | 4.39E-09 |  | 72.95058 | 0.832253 | 0.79843<br>Tetratricopeptide-like helical domain containing protein. (Os03t0308800-01);Hypothetical conserved gene. (Os03t0308800-02);Hypothetical conserved gene. (Os03t0308800-03)                     |
| Os05g0579500 | 58.20514 | 1.255896 | 0.035572 |  | 48.12696 | 0.830652 | 0.767474<br>Similar to 10A191.7. (Os05t0579500-01)                                                                                                                                                       |
| Os01g0215500 | 166.815  | 2.363828 | 1.47E-06 |  | 75.92709 | 0.8293   | 0.99986<br>Similar to esterase. (Os01t0215500-01)                                                                                                                                                        |
| Os01g0371500 | 8306.163 | 1.005934 | 0.002475 |  | 7726.827 | 0.827527 | 0.05213<br>Similar to Glutathione-S-transferase 19E50. (Os01t0371500-01)                                                                                                                                 |
| Os02g0572500 | 1677.341 | 1.163525 | 8.26E-05 |  | 1445.825 | 0.82291  | 0.130055<br>Non-protein coding transcript. (Os02t0572500-00)                                                                                                                                             |
| Os03g0730433 | 678.091  | 1.302103 | 0.000336 |  | 545.2417 | 0.819382 | 0.814055<br>Hypothetical protein. (Os03t0730433-00)                                                                                                                                                      |
| Os03g0730400 | 690.2346 | 1.302293 | 0.000491 |  | 554.4681 | 0.817416 | 0.842789<br>Similar to Serine carboxypeptidase. (Os03t0730400-01);Similar to Serine carboxypeptidase family protein, expressed. (Os03t0730400-02)                                                        |
| Os06g0676300 | 164.3871 | 1.327597 | 0.003021 |  | 130.358  | 0.815672 | 0.535404<br>Non-protein coding transcript. (Os06t0676300-02)                                                                                                                                             |
| Os02g0799000 | 945.0245 | 0.73241  | 0.085676 |  | 988.1056 | 0.814816 | 0.043168<br>Protein phosphatase 2C 27, Negative regulation of cold tolerance (Os02t0799000-01)                                                                                                           |
| Os10g0530750 | 324.5443 | 0.951804 | 0.000448 |  | 306.2433 | 0.805003 | 0.108002<br>Hypothetical protein. (Os10t0530750-00)                                                                                                                                                      |
| Os03g0290300 | 710.6947 | 1.607514 | 1.61E-05 |  | 485.1962 | 0.800769 | 0.404109<br>Similar to W-3 fatty acid desaturase (Fragment). (Os03t0290300-01)                                                                                                                           |
| Os09g0464066 | 36.5933  | 2.027671 | 0.016115 |  | 19.92394 | 0.800423 | 0.99986<br>Hypothetical protein. (Os09t0464066-00)                                                                                                                                                       |
| Os01g0658900 | 542.8458 | 1.128594 | 0.018761 |  | 468.3966 | 0.788171 | 0.170285<br>bZIP class abscisic acid responsive element (ABRE)-binding factor, Salt tolerance (Os01t0658900-01)                                                                                          |
| Os11g0267300 | 652.0601 | 1.467845 | 6.31E-07 |  | 475.1768 | 0.783156 | 0.174397<br>Similar to Endonuclease III homologue. (Os11t0267300-01)                                                                                                                                     |
| Os01g0687300 | 1530.743 | 1.193927 | 7.71E-05 |  | 1271.053 | 0.77101  | 0.169921<br>Conserved hypothetical protein. (Os01t0687300-01);Conserved hypothetical protein. (Os01t0687300-02)                                                                                          |
| Os05g0186900 | 74.05651 | 2.528519 | 0.000226 |  | 29.76325 | 0.768468 | 0.99986<br>Similar to Auxin-responsive protein IAA16.                                                                                                                                                    |

|              |          |          |          |  |          |          |          |                                                                                                                                                                                                                                                           |
|--------------|----------|----------|----------|--|----------|----------|----------|-----------------------------------------------------------------------------------------------------------------------------------------------------------------------------------------------------------------------------------------------------------|
|              |          |          |          |  |          |          |          | (Os05t0186900-01)                                                                                                                                                                                                                                         |
| Os01g0246200 | 97.26005 | 1.961034 | 0.001996 |  | 54.06192 | 0.764131 | 0.99986  | Similar to TCP-domain protein. (Os01t0246200-00)                                                                                                                                                                                                          |
| Os06g0725200 | 58.29276 | 2.475678 | 3.41E-05 |  | 24.15888 | 0.763285 | 0.99986  | Lipase, GDSL domain containing protein. (Os06t0725200-01)                                                                                                                                                                                                 |
| Os04g0412100 | 47.76364 | 2.891808 | 1.14E-08 |  | 15.3829  | 0.761937 | 0.99986  | Similar to H0717B12.8 protein. (Os04t0412100-01)                                                                                                                                                                                                          |
| Os02g0572400 | 3379.44  | 1.195354 | 4.21E-05 |  | 2789.293 | 0.758936 | 0.282038 | Similar to Riboflavin biosynthesis protein ribA, chloroplast precursor [Includes: GTP cyclohydrolase II (EC 3.5.4.25); 3,4-dihydroxy-2-butanone 4- phosphate synthase (DHBP synthase)]. (Os02t0572400-01);Similar to predicted protein. (Os02t0572400-02) |
| Os01g0705200 | 32.18241 | 2.863022 | 0.015434 |  | 10.55447 | 0.758916 | 0.99986  | Late embryogenesis abundant protein repeat containing protein. (Os01t0705200-01)                                                                                                                                                                          |
| Os05g0582300 | 870.6478 | 1.331489 | 7.76E-11 |  | 670.9907 | 0.755347 | 0.239933 | Solanesyl diphosphate synthase, Providing solanesyl diphosphate for plastoquinone-9 (PQ-9) formation (Os05t0582300-01)                                                                                                                                    |
| Os05g0582350 | 461.2915 | 1.318571 | 1.64E-07 |  | 357.771  | 0.754717 | 0.258722 | Hypothetical protein. (Os05t0582350-00)                                                                                                                                                                                                                   |
| Os02g0600200 | 65.69185 | 1.664174 | 0.001952 |  | 42.59182 | 0.751376 | 0.99986  | IQ calmodulin-binding region domain containing protein. (Os02t0600200-01);Similar to predicted protein. (Os02t0600200-02)                                                                                                                                 |
| Os04g0564700 | 427.0836 | 0.985857 | 0.012291 |  | 386.6488 | 0.745296 | 0.483419 | WD40 repeat domain containing protein. (Os04t0564700-01);Similar to OSIGBa0158F05.3 protein. (Os04t0564700-02)                                                                                                                                            |
| Os03g0235400 | 134.5055 | 0.987971 | 0.024762 |  | 121.4404 | 0.744339 | 0.732748 | Hypothetical protein. (Os03t0235400-01)                                                                                                                                                                                                                   |
| Os05g0127200 | 1663.173 | 1.028792 | 0.033116 |  | 1473.56  | 0.743193 | 0.99986  | Similar to Phospholipase C (Fragment). (Os05t0127200-01);Similar to Phospholipase C (Fragment). (Os05t0127200-02)                                                                                                                                         |
| Os12g0134000 | 661.4288 | 0.761129 | 0.007483 |  | 661.7177 | 0.74305  | 0.075611 | Similar to Hydroxymethylglutaryl-CoA lyase. (Os12t0134000-01);Similar to hydroxymethylglutaryl-CoA lyase. (Os12t0134000-02)                                                                                                                               |
| Os05g0127266 | 628.9227 | 0.986013 | 0.017472 |  | 568.0853 | 0.740929 | 0.99986  | Non-protein coding transcript. (Os05t0127266-00)                                                                                                                                                                                                          |
| Os11g0694125 | 150.0213 | 1.293429 | 0.040654 |  | 116.9365 | 0.738226 | 0.99986  | Hypothetical protein. (Os11t0694125-00)                                                                                                                                                                                                                   |
| Os07g0615200 | 6088.244 | 1.333785 | 9.08E-09 |  | 4646.14  | 0.735042 | 0.066661 | Tify domain containing protein. (Os07t0615200-01)                                                                                                                                                                                                         |

|              |          |          |          |  |          |          |          |                                                                                                                                                                                                       |
|--------------|----------|----------|----------|--|----------|----------|----------|-------------------------------------------------------------------------------------------------------------------------------------------------------------------------------------------------------|
| Os05g0149450 | 269.8451 | 2.884153 | 0.005726 |  | 86.03796 | 0.72977  | 0.99986  | Non-protein coding transcript. (Os05t0149450-00)                                                                                                                                                      |
| Os01g0775100 | 3255.057 | 1.193357 | 7.64E-05 |  | 2648.727 | 0.72382  | 0.326568 | Plus-3 domain containing protein. (Os01t0775100-01)                                                                                                                                                   |
| Os01g0676900 | 1637.608 | 0.92632  | 0.001045 |  | 1509.202 | 0.722757 | 0.119372 | Hypothetical conserved gene. (Os01t0676900-01)                                                                                                                                                        |
| Os02g0816600 | 165.4405 | 1.764658 | 1.19E-06 |  | 100.1244 | 0.714206 | 0.850898 | Similar to ABC(yeast) homolog1. (Os02t0816600-01);Similar to ABC1 family protein. (Os02t0816600-02)                                                                                                   |
| Os01g0124200 | 5080.464 | 1.321997 | 0.000241 |  | 3854.073 | 0.70807  | 0.99986  | Bowman-Birk type trypsin inhibitor, Target of a fungal effector and an NLR receptor for innate immunity, Resistance to fungal pathogen M. oryzae (Os01t0124200-02)                                    |
| Os02g0203000 | 432.9915 | 1.480074 | 5.89E-05 |  | 303.5258 | 0.707957 | 0.707181 | bZIP transcription factor, Homolog of Arabidopsis HY5 transcription factor, Photomorphogenesis (Os02t0203000-01)                                                                                      |
| Os01g0246400 | 165.6733 | 2.107718 | 0.000419 |  | 82.31755 | 0.69431  | 0.99986  | Similar to Low molecular mass early light-inducible protein HV90, chloroplast precursor (ELIP). (Os01t0246400-01)                                                                                     |
| Os05g0542200 | 3231.101 | 1.061906 | 4.95E-06 |  | 2754.23  | 0.687524 | 0.047213 | Alpha/beta hydrolase fold-1 domain containing protein. (Os05t0542200-01);Similar to catalytic/ hydrolase. (Os05t0542200-02);Similar to cDNA clone:J023112L03, full insert sequence. (Os05t0542200-03) |
| Os03g0245100 | 641.4068 | 0.995528 | 0.012291 |  | 563.637  | 0.685265 | 0.638892 | NAD(P)-binding domain containing protein. (Os03t0245100-01);Similar to Dihydrodipicolinate reductase. (Os03t0245100-02);NAD(P)-binding domain containing protein. (Os03t0245100-03)                   |
| Os11g0691300 | 479.412  | 1.11866  | 0.00225  |  | 397.1397 | 0.682274 | 0.290911 | Similar to Protein kinase. (Os11t0691300-00)                                                                                                                                                          |
| Os05g0578750 | 1054.68  | 0.883362 | 0.001073 |  | 973.326  | 0.680933 | 0.192832 | Hypothetical protein. (Os05t0578750-00)                                                                                                                                                               |
| Os05g0292800 | 57.83938 | 1.63914  | 0.041416 |  | 36.90271 | 0.680322 | 0.99986  | Similar to One helix protein (OHP). (Os05t0292800-01)                                                                                                                                                 |
| Os05g0542150 | 1435.539 | 0.967027 | 0.000965 |  | 1274.411 | 0.679063 | 0.151852 | Hypothetical gene. (Os05t0542150-01)                                                                                                                                                                  |
| Os01g0775150 | 771.2827 | 1.046552 | 0.006106 |  | 658.6237 | 0.673672 | 0.640465 | Non-protein coding transcript. (Os01t0775150-00)                                                                                                                                                      |
| Os05g0578600 | 1365.723 | 0.923476 | 0.000491 |  | 1233.653 | 0.673113 | 0.150903 | Similar to Polygalacturonase PG2. (Os05t0578600-01)                                                                                                                                                   |
| Os11g0694100 | 209.7272 | 1.1788   | 0.043413 |  | 167.445  | 0.664451 | 0.99986  | Similar to Protein kinase domain containing protein, expressed. (Os11t0694100-01)                                                                                                                     |

|              |          |          |          |  |          |          |          |                                                                                                                                                                                                                                                                                           |
|--------------|----------|----------|----------|--|----------|----------|----------|-------------------------------------------------------------------------------------------------------------------------------------------------------------------------------------------------------------------------------------------------------------------------------------------|
| Os11g0691100 | 19710.05 | 1.212693 | 6.36E-06 |  | 15358.47 | 0.644419 | 0.535404 | Similar to Protein kinase. (Os11t0691100-00)                                                                                                                                                                                                                                              |
| Os03g0390200 | 1334.462 | 1.270951 | 7.86E-11 |  | 1009.182 | 0.641266 | 0.075835 | Serine/threonine protein kinase, Hyperosmotic stress response (Os03t0390200-01);Serine/threonine-protein kinase SAPK1 (EC 2.7.1.37) (Osmotic stress/abscisic acid-activated protein kinase 1). (Os03t0390200-02)                                                                          |
| Os11g0691050 | 19070.17 | 1.198367 | 1.56E-05 |  | 14923.07 | 0.638038 | 0.606991 | Hypothetical protein. (Os11t0691050-00)                                                                                                                                                                                                                                                   |
| Os08g0440100 | 1830.376 | 1.182633 | 0.003814 |  | 1439.211 | 0.633787 | 0.970711 | Similar to Temperature stress-induced lipocalin. (Os08t0440100-01)                                                                                                                                                                                                                        |
| Os01g0880250 | 2344.621 | 0.722816 | 0.015785 |  | 2273.455 | 0.630789 | 0.364018 | Hypothetical protein. (Os01t0880250-00)                                                                                                                                                                                                                                                   |
| Os01g0880200 | 2733.41  | 0.742922 | 0.009588 |  | 2620.216 | 0.624206 | 0.378434 | Xylan glucuronosyltransferase, Accumulation of cellulose and hemicellulose in the cell wall deposition (Os01t0880200-01);Similar to secondary cell wall-related glycosyltransferase family 8. (Os01t0880200-02);Similar to cDNA clone:J013112C08, full insert sequence. (Os01t0880200-03) |
| Os08g0501500 | 116.5003 | 1.277113 | 0.00261  |  | 87.14702 | 0.623404 | 0.99986  | EGF-type aspartate/asparagine hydroxylation site domain containing protein. (Os08t0501500-00)                                                                                                                                                                                             |
| Os03g0781750 | 923.0547 | 0.928541 | 0.000117 |  | 813.9838 | 0.622173 | 0.303964 | Non-protein coding transcript. (Os03t0781750-00)                                                                                                                                                                                                                                          |
| Os06g0215900 | 3964.686 | 1.366348 | 1.77E-05 |  | 2832.583 | 0.619915 | 0.99986  | Similar to Oxo-phytodienoic acid reductase. (Os06t0215900-01);Similar to 12-oxophytodienoic acid reductase. (Os06t0215900-02)                                                                                                                                                             |
| Os06g0669400 | 2078.758 | 1.08502  | 0.000202 |  | 1702.075 | 0.617668 | 0.143504 | ATP-dependent zinc metalloprotease, Chloroplast development (Os06t0669400-01);Similar to Cell division protease ftsH homolog 2, chloroplastic. (Os06t0669400-02);Similar to ATP-dependent zinc metalloprotease FTSH 2, chloroplastic. (Os06t0669400-03)                                   |
| Os04g0517100 | 1658.577 | 0.739578 | 0.035539 |  | 1585.334 | 0.614472 | 0.021728 | Similar to OSIGBa0145M07.4 protein. (Os04t0517100-01);SG2-type MYB transcription factor, Cold tolerance, Resistance to fungal and bacterial                                                                                                                                               |

|              |          |          |          |  |          |          |                                                                                                                                                                                                                                                       |
|--------------|----------|----------|----------|--|----------|----------|-------------------------------------------------------------------------------------------------------------------------------------------------------------------------------------------------------------------------------------------------------|
|              |          |          |          |  |          |          | pathogens, Panicle development (Os04t0517100-02)                                                                                                                                                                                                      |
| Os06g0215925 | 4046.206 | 1.36691  | 1.77E-05 |  | 2880.31  | 0.611831 | 0.99986 Non-protein coding transcript. (Os06t0215925-00)                                                                                                                                                                                              |
| Os03g0781700 | 1263.335 | 0.954648 | 1.48E-05 |  | 1095.711 | 0.611062 | 0.29642 Reticulon family protein. (Os03t0781700-01)                                                                                                                                                                                                   |
| Os04g0623300 | 3998.37  | 1.241803 | 1.17E-05 |  | 3024.317 | 0.607408 | 0.529143 Polyamine oxidase, Seed germination (Os04t0623300-01);Similar to H0215F08.3 protein. (Os04t0623300-02);Similar to H0215F08.3 protein. (Os04t0623300-03);Similar to H0215F08.3 protein. (Os04t0623300-04)                                     |
| Os11g0134300 | 1779.625 | 0.816728 | 0.041416 |  | 1639.255 | 0.605816 | 0.849414 Similar to Serine/threonine kinase. (Os11t0134300-01)                                                                                                                                                                                        |
| Os02g0222100 | 949.0165 | 1.026071 | 0.028455 |  | 793.2598 | 0.600357 | 0.881556 Similar to Cysteine synthase (EC 4.2.99.8). (Os02t0222100-01)                                                                                                                                                                                |
| Os03g0767500 | 348.5397 | 0.865335 | 0.003001 |  | 312.6743 | 0.595629 | 0.241688 Thioredoxin domain 2 containing protein. (Os03t0767500-01)                                                                                                                                                                                   |
| Os02g0711400 | 459.3779 | 0.993237 | 0.003021 |  | 387.6616 | 0.588629 | 0.750034 Conserved hypothetical protein. (Os02t0711400-01)                                                                                                                                                                                            |
| Os09g0401300 | 2417.472 | 1.452998 | 2.13E-19 |  | 1618.989 | 0.568303 | 0.040984 A member of the JASMONATE ZIM-domain (JAZ) family, Negative modulation of JA signaling and antiviral defense (Os09t0401300-01);Similar to ZIM motif family protein. (Os09t0401300-02);Similar to ZIM motif family protein. (Os09t0401300-03) |
| Os05g0320800 | 891.6616 | 0.919278 | 0.002418 |  | 769.7619 | 0.561873 | 0.640465 Hypothetical protein. (Os05t0320800-01)                                                                                                                                                                                                      |
| Os01g0362100 | 608.6687 | 0.808728 | 0.007986 |  | 546.3794 | 0.537054 | 0.675826 Esterase/lipase/thioesterase domain containing protein. (Os01t0362100-01)                                                                                                                                                                    |
| Os08g0288000 | 1146.773 | 0.727467 | 0.000719 |  | 1065.058 | 0.53243  | 0.174397 Conserved hypothetical protein. (Os08t0288000-01);Conserved hypothetical protein. (Os08t0288000-02)                                                                                                                                          |
| Os01g0797600 | 870.8832 | 1.261179 | 3.02E-09 |  | 630.5082 | 0.525366 | 0.99986 AP2/ERF family protein, ERF-associated EAR-motif-containing repressor, Abiotic stress response, Stress signaling (Os01t0797600-01)                                                                                                            |
| Os06g0590301 | 619.6777 | 1.157045 | 1.34E-05 |  | 471.5598 | 0.524045 | 0.817442 Similar to short-chain dehydrogenase/reductase (SDR) family protein. (Os06t0590301-01)                                                                                                                                                       |
| Os07g0123800 | 142.0341 | 1.351771 | 0.046918 |  | 97.96764 | 0.521246 | 0.99986 Uncharacterised conserved protein UCP031279 domain containing protein. (Os07t0123800-01)                                                                                                                                                      |
| Os09g0554000 | 90.60691 | 1.300265 | 0.003469 |  | 64.07874 | 0.511237 | 0.99986 Similar to Mitochondrial phosphate transporter. (Os09t0554000-01)                                                                                                                                                                             |



|              |          |          |          |  |          |          |          |                                                                                                                                                                                                                                                                                                                                                                                                   |
|--------------|----------|----------|----------|--|----------|----------|----------|---------------------------------------------------------------------------------------------------------------------------------------------------------------------------------------------------------------------------------------------------------------------------------------------------------------------------------------------------------------------------------------------------|
| Os04g0583101 | 142.7454 | 1.427797 | 1.36E-05 |  | 94.50208 | 0.509842 | 0.99986  | Pentatricopeptide repeat domain containing protein. (Os04t0583101-01)                                                                                                                                                                                                                                                                                                                             |
| Os04g0619000 | 216.8178 | 1.359869 | 0.02753  |  | 147.7975 | 0.500192 | 0.99986  | Similar to L1332.9 protein. (Os04t0619000-01)                                                                                                                                                                                                                                                                                                                                                     |
| Os11g0216300 | 625.5124 | 0.75841  | 0.024272 |  | 565.6317 | 0.49962  | 0.535404 | ABC-1 domain containing protein. (Os11t0216300-01);Similar to ABC1 family protein, expressed. (Os11t0216300-02)                                                                                                                                                                                                                                                                                   |
| Os01g0847200 | 2393.879 | 0.706446 | 0.015568 |  | 2213.415 | 0.498766 | 0.99986  | Similar to Mannose-1-phosphate guanylyltransferase (EC 2.7.7.13) (ATP-mannose-1-phosphate guanylyltransferase) (GDP-mannose pyrophosphorylase) (NDP-hexose pyrophosphorylase). (Os01t0847200-01);Similar to Mannose-1-phosphate guanylyltransferase (EC 2.7.7.13) (ATP-mannose-1-phosphate guanylyltransferase) (GDP-mannose pyrophosphorylase) (NDP-hexose pyrophosphorylase). (Os01t0847200-02) |
| Os01g0739200 | 834.7512 | 0.896682 | 0.000223 |  | 707.3245 | 0.490591 | 0.884022 | Protein-tyrosine phosphatase, dual specificity domain containing protein. (Os01t0739200-01)                                                                                                                                                                                                                                                                                                       |
| Os06g0215750 | 8232.544 | 1.428927 | 2.37E-05 |  | 5397.484 | 0.487986 | 0.99986  | Hypothetical gene. (Os06t0215750-00)                                                                                                                                                                                                                                                                                                                                                              |
| Os01g0847250 | 2053.254 | 0.701811 | 0.018554 |  | 1893.864 | 0.487856 | 0.99986  | Non-protein coding transcript. (Os01t0847250-00)                                                                                                                                                                                                                                                                                                                                                  |
| Os06g0215600 | 8064.925 | 1.416628 | 2.37E-05 |  | 5302.384 | 0.479464 | 0.99986  | Similar to Oxo-phytodienoic acid reductase. (Os06t0215600-02)                                                                                                                                                                                                                                                                                                                                     |
| Os02g0620400 | 152.4294 | 1.292305 | 0.040906 |  | 105.6914 | 0.455945 | 0.99986  | RmlC-like jelly roll fold domain containing protein. (Os02t0620400-01)                                                                                                                                                                                                                                                                                                                            |
| Os12g0263000 | 6910.11  | 0.52998  | 0.031184 |  | 6741.443 | 0.449115 | 0.655575 | Similar to Glutathione synthase. (Os12t0263000-01);Hydroxymethyl-glutathione synthetase (Os12t0263000-02)                                                                                                                                                                                                                                                                                         |
| Os03g0252100 | 316.974  | 1.424252 | 0.005955 |  | 204.455  | 0.443642 | 0.99986  | Alpha/beta hydrolase fold-3 domain containing protein. (Os03t0252100-01)                                                                                                                                                                                                                                                                                                                          |
| Os03g0273800 | 17278.65 | 0.843302 | 0.000116 |  | 14648.29 | 0.432524 | 0.787682 | HAD-superfamily hydrolase, subfamily IA, variant 3 domain containing protein. (Os03t0273800-01)                                                                                                                                                                                                                                                                                                   |
| Os04g0558400 | 706.7844 | 0.803429 | 0.00494  |  | 609.6334 | 0.431312 | 0.698939 | RmlC-like jelly roll fold domain containing protein. (Os04t0558400-01);Similar to acyl-CoA thioesterase family protein. (Os04t0558400-02)                                                                                                                                                                                                                                                         |

|              |          |          |          |  |          |          |          |                                                                                                                                                                                                                                                                                                                                                                              |
|--------------|----------|----------|----------|--|----------|----------|----------|------------------------------------------------------------------------------------------------------------------------------------------------------------------------------------------------------------------------------------------------------------------------------------------------------------------------------------------------------------------------------|
| Os09g0362500 | 788.3718 | 1.115784 | 1.35E-09 |  | 588.7336 | 0.429881 | 0.99986  | Peptidase M1, membrane alanine aminopeptidase family protein. (Os09t0362500-01)                                                                                                                                                                                                                                                                                              |
| Os10g0567400 | 396.7085 | 1.799577 | 4.35E-05 |  | 207.9474 | 0.411536 | 0.99986  | Chlorophyllide a oxygenase, Chlorophyll b synthesis, Regulation of photosynthesis, Chlorophyll degradation and ROS scavenging, Regulation of both natural and induced senescence (Os10t0567400-01);Similar to Isoform 2 of Chlorophyllide a oxygenase, chloroplastic. (Os10t0567400-02);Similar to Isoform 2 of Chlorophyllide a oxygenase, chloroplastic. (Os10t0567400-03) |
| Os05g0136200 | 1269.473 | 0.984164 | 0.000994 |  | 1000.254 | 0.408064 | 0.99986  | Serine/threonine protein kinase domain containing protein. (Os05t0136200-01);Serine/threonine protein kinase domain containing protein. (Os05t0136200-02)                                                                                                                                                                                                                    |
| Os08g0104900 | 734.1032 | 0.64511  | 0.015368 |  | 671.6902 | 0.4075   | 0.699343 | Protein of unknown function DUF6, transmembrane domain containing protein. (Os08t0104900-01);Protein of unknown function DUF6, transmembrane domain containing protein. (Os08t0104900-02)                                                                                                                                                                                    |
| Os05g0320300 | 442.4823 | 0.872933 | 0.001678 |  | 366.2484 | 0.406029 | 0.99986  | Similar to Homeobox protein. (Os05t0320300-01)                                                                                                                                                                                                                                                                                                                               |
| Os09g0464000 | 1636.932 | 0.74657  | 0.012142 |  | 1432.174 | 0.40508  | 0.99986  | Similar to Carbonate dehydratase-like protein. (Os09t0464000-01);Similar to Carbonate dehydratase-like protein. (Os09t0464000-02)                                                                                                                                                                                                                                            |
| Os04g0583000 | 157.2013 | 1.305542 | 2.09E-05 |  | 106.0187 | 0.404717 | 0.99986  | Conserved hypothetical protein. (Os04t0583000-01)                                                                                                                                                                                                                                                                                                                            |
| Os09g0464033 | 1655.986 | 0.739124 | 0.01248  |  | 1450.457 | 0.399716 | 0.99986  | Hypothetical gene. (Os09t0464033-01)                                                                                                                                                                                                                                                                                                                                         |
| Os02g0254700 | 1800.028 | 0.491732 | 0.043171 |  | 1745.204 | 0.394302 | 0.99986  | Similar to Spermidine synthase 3. (Os02t0254700-01)                                                                                                                                                                                                                                                                                                                          |
| Os01g0804400 | 81.48327 | 1.212375 | 0.013908 |  | 56.90357 | 0.379491 | 0.99986  | Cytochrome P450 family protein. (Os01t0804400-01)                                                                                                                                                                                                                                                                                                                            |
| Os01g0159300 | 1080.7   | 0.714989 | 0.0488   |  | 948.8192 | 0.378226 | 0.99986  | Zinc finger, RING/FYVE/PHD-type domain containing protein. (Os01t0159300-01)                                                                                                                                                                                                                                                                                                 |
| Os01g0305200 | 484.4717 | 0.981237 | 0.000226 |  | 376.8695 | 0.37136  | 0.99986  | Lg106-like family protein. (Os01t0305200-01)                                                                                                                                                                                                                                                                                                                                 |
| Os08g0243500 | 3342.156 | 0.677822 | 0.000415 |  | 2971.263 | 0.370331 | 0.79843  | Similar to NADPH-cytochrome P450 oxydoreductase isoform 2. (Os08t0243500-01);Similar to NADPH--cytochrome P450 reductase. (Os08t0243500-02)                                                                                                                                                                                                                                  |

|              |          |           |          |  |          |          |         |                                                                                                                                                                                                                                  |
|--------------|----------|-----------|----------|--|----------|----------|---------|----------------------------------------------------------------------------------------------------------------------------------------------------------------------------------------------------------------------------------|
| Os01g0615100 | 279.1895 | 2.53456   | 7.87E-06 |  | 94.79338 | 0.362392 | 0.99986 | Chymotrypsin protease inhibitor, Salt and osmotic stress tolerance (Os01t0615100-01)                                                                                                                                             |
| Os04g0600200 | 584.5172 | 1.382212  | 0.005955 |  | 372.7381 | 0.360394 | 0.99986 | Homodimeric diiron-carboxylate protein, Cyanide-resistant respiration in mitochondria, Reactive oxygen species (ROS) scavenging (Os04t0600200-01)                                                                                |
| Os02g0179225 | 217.9436 | 1.217672  | 0.000493 |  | 150.5056 | 0.357577 | 0.99986 | Hypothetical protein. (Os02t0179225-00)                                                                                                                                                                                          |
| Os07g0672566 | 155.7467 | 1.253403  | 0.001309 |  | 105.906  | 0.357331 | 0.99986 | Hypothetical gene. (Os07t0672566-00)                                                                                                                                                                                             |
| Os04g0105100 | 348.9116 | 1.009256  | 0.027241 |  | 265.8961 | 0.352274 | 0.99986 | Zinc finger, RING/FYVE/PHD-type domain containing protein. (Os04t0105100-01);RING E3 ligase, Negative regulation of salt stress response (Os04t0105100-02)                                                                       |
| Os09g0544300 | 1067.189 | 0.638538  | 0.00201  |  | 957.7734 | 0.351964 | 0.99986 | ATMRK serine/threonine protein kinase-like domain containing protein. (Os09t0544300-01)                                                                                                                                          |
| Os10g0392500 | 230.6719 | 0.964663  | 0.022071 |  | 178.9702 | 0.346515 | 0.99986 | Similar to RNA methyltransferase, TrmH family protein, expressed. (Os10t0392500-00)                                                                                                                                              |
| Os05g0179100 | 398.8255 | -0.710649 | 0.027596 |  | 566.3251 | 0.344015 | 0.99986 | DVL family protein. (Os05t0179100-01)                                                                                                                                                                                            |
| Os06g0318566 | 129.4327 | 1.604804  | 0.000131 |  | 73.15277 | 0.340924 | 0.99986 | Hypothetical protein. (Os06t0318566-00)                                                                                                                                                                                          |
| Os02g0179200 | 245.7202 | 1.193679  | 0.000672 |  | 170.2973 | 0.336882 | 0.99986 | Glutamine amidotransferase class-I domain containing protein. (Os02t0179200-01)                                                                                                                                                  |
| Os03g0156700 | 1127.221 | 0.739678  | 0.001562 |  | 961.1798 | 0.331011 | 0.99986 | Zebra-necrosis like protein, Nickel/cobalt transporter, high-affinity domain containing protein (Os03t0156700-01)                                                                                                                |
| Os06g0634300 | 796.51   | 0.714619  | 0.005327 |  | 685.2567 | 0.326475 | 0.99986 | Similar to cDNA clone:J023074C15, full insert sequence. (Os06t0634300-01);Similar to Nudix hydrolase 2 (EC 3.6.1.-) (AtNUDT2) (ADP-ribose pyrophosphatase) (EC 3.6.1.13) (NADH pyrophosphatase) (EC 3.6.1.22). (Os06t0634300-02) |
| Os04g0653000 | 6158.263 | 0.669641  | 0.013931 |  | 5386.171 | 0.318287 | 0.99986 | Jasmonic acid (JA) signalling repressor, Regulation of spikelet development (Os04t0653000-01)                                                                                                                                    |
| Os06g0154400 | 253.756  | 0.97834   | 0.001988 |  | 193.5151 | 0.317402 | 0.99986 | Domain of unknown function DUF676, lipase-like domain containing protein. (Os06t0154400-01)                                                                                                                                      |

|              |          |           |          |  |          |          |         |                                                                                                                                               |
|--------------|----------|-----------|----------|--|----------|----------|---------|-----------------------------------------------------------------------------------------------------------------------------------------------|
| Os06g0318600 | 132.1952 | 1.560999  | 0.000239 |  | 75.66229 | 0.314568 | 0.99986 | Peptidase S41 domain containing protein. (Os06t0318600-01)                                                                                    |
| Os01g0168100 | 1664.117 | 0.651931  | 0.046294 |  | 1463.878 | 0.313662 | 0.99986 | KIP1-like domain containing protein. (Os01t0168100-01);Similar to CENP-E like kinetochore protein. (Os01t0168100-02)                          |
| Os06g0574100 | 290.9903 | 1.043864  | 0.000783 |  | 214.3476 | 0.30545  | 0.99986 | Similar to predicted protein. (Os06t0574100-00)                                                                                               |
| Os11g0186200 | 9594.73  | 0.638157  | 0.028279 |  | 8452.035 | 0.302706 | 0.99986 | Similar to Aldehyde dehydrogenase (EC 1.2.1.3). (Os11t0186200-01)                                                                             |
| Os12g0617800 | 413.202  | 1.580236  | 6.03E-06 |  | 233.0062 | 0.299687 | 0.99986 | Cation/H <sup>+</sup> exchanger domain containing protein. (Os12t0617800-01)                                                                  |
| Os07g0672600 | 188.9581 | 1.242752  | 0.002323 |  | 126.1376 | 0.296057 | 0.99986 | Hypothetical conserved gene. (Os07t0672600-00)                                                                                                |
| Os01g0753100 | 709.1655 | 0.785325  | 0.000226 |  | 584.4158 | 0.294732 | 0.99986 | Alcohol dehydrogenase superfamily, zinc-containing protein. (Os01t0753100-01);Similar to reticulon-4-interacting protein 1. (Os01t0753100-02) |
| Os03g0259100 | 2568.062 | -0.911238 | 0.016409 |  | 3752.322 | 0.286529 | 0.99986 | Similar to Basic blue protein (Cusacyanin) (Plantacyanin) (CBP). (Os03t0259100-01)                                                            |
| Os05g0566450 | 2514.233 | 0.718293  | 0.016588 |  | 2125.221 | 0.283768 | 0.99986 | Non-protein coding transcript. (Os05t0566450-00)                                                                                              |
| Os02g0165100 | 688.6634 | 0.682792  | 0.029931 |  | 590.5033 | 0.281439 | 0.99986 | Protein kinase, core domain containing protein. (Os02t0165100-01)                                                                             |
| Os04g0461600 | 48.9972  | 1.305     | 0.032319 |  | 31.40059 | 0.271289 | 0.99986 | Similar to Fw2.2. (Os04t0461600-01)                                                                                                           |
| Os05g0144100 | 729.6811 | 0.855077  | 0.02363  |  | 578.0259 | 0.271145 | 0.99986 | WD40 repeat-like domain containing protein. (Os05t0144100-01)                                                                                 |
| Os05g0569300 | 899.1932 | 1.205558  | 6.54E-05 |  | 602.2806 | 0.258098 | 0.99986 | Similar to G-box binding factor 1. (Os05t0569300-01)                                                                                          |
| Os01g0534900 | 9194.719 | 0.539748  | 0.039895 |  | 8266.406 | 0.248204 | 0.99986 | Similar to Hv711N16.16 (Fragment). (Os01t0534900-01)                                                                                          |
| Os05g0114400 | 227.2454 | -1.239005 | 0.046245 |  | 351.2739 | 0.245065 | 0.99986 | Zinc finger, C2H2-type domain containing protein. (Os05t0114400-01)                                                                           |
| Os07g0150100 | 5054.455 | 0.64766   | 0.001555 |  | 4332.343 | 0.240964 | 0.99986 | Protein of unknown function DUF221 domain containing protein. (Os07t0150100-01)                                                               |
| Os05g0257100 | 240.8368 | 0.969795  | 0.034332 |  | 178.2011 | 0.227852 | 0.99986 | Leucine-rich repeat, plant specific containing protein. (Os05t0257100-01);Similar to SHR5-receptor-like kinase (Fragment). (Os05t0257100-02)  |
| Os08g0136001 | 1225.337 | 0.745155  | 0.006113 |  | 1000.208 | 0.222235 | 0.99986 | Hypothetical gene. (Os08t0136001-00)                                                                                                          |
| Os01g0717000 | 2730.697 | 0.835506  | 0.004247 |  | 2137.959 | 0.2168   | 0.99986 | Similar to GmCK1p (EC 2.7.1.32). (Os01t0717000-01)                                                                                            |

|              |          |          |          |  |          |          |                                                                                                                                                                                                                                                      |
|--------------|----------|----------|----------|--|----------|----------|------------------------------------------------------------------------------------------------------------------------------------------------------------------------------------------------------------------------------------------------------|
|              |          |          |          |  |          |          | 01);Similar to Choline kinase. (Os01t0717000-02);Similar to Choline kinase. (Os01t0717000-05)                                                                                                                                                        |
| Os03g0654400 | 834.5036 | 1.097705 | 3.39E-08 |  | 576.9926 | 0.206046 | 0.99986<br>Similar to Cationic amino acid transporter-like protein. (Os03t0654400-01);Similar to High-affinity cationic amino acid transporter 1. (Os03t0654400-02)                                                                                  |
| Os01g0535001 | 5217.268 | 0.5817   | 0.022329 |  | 4530.268 | 0.201765 | 0.99986<br>Non-protein coding transcript. (Os01t0535001-00)                                                                                                                                                                                          |
| Os04g0671100 | 513.8027 | 0.846702 | 0.001068 |  | 396.9409 | 0.194283 | 0.99986<br>Similar to H0624F09.8 protein. (Os04t0671100-01)                                                                                                                                                                                          |
| Os07g0125500 | 1387.365 | 0.700837 | 0.017826 |  | 1141.999 | 0.193439 | 0.99986<br>Allergen V5/Tpx-1 related family protein. (Os07t0125500-01)                                                                                                                                                                               |
| Os01g0127600 | 187.8271 | 1.636858 | 0.001505 |  | 98.42601 | 0.19026  | 0.99986<br>Similar to Bowman-Birk type proteinase inhibitor D-II precursor (IV). (Os01t0127600-01)                                                                                                                                                   |
| Os01g0757301 | 110.7124 | 1.806684 | 0.000448 |  | 53.10051 | 0.188476 | 0.99986<br>Non-protein coding transcript. (Os01t0757301-00)                                                                                                                                                                                          |
| Os08g0135900 | 1798.164 | 0.766837 | 0.001028 |  | 1425.261 | 0.168307 | 0.99986<br>Similar to Tryptophan synthase beta chain 1 (EC 4.2.1.20) (Orange pericarp 1) (Fragment). (Os08t0135900-01);Similar to Tryptophan synthase beta-subunit. (Os08t0135900-02);Similar to Tryptophan synthase beta-subunit. (Os08t0135900-03) |
| Os03g0251500 | 2373.723 | 0.683104 | 0.015568 |  | 1936.499 | 0.148176 | 0.99986<br>Similar to T-cell immune regulator 1 transcript variant 3 (Fragment). (Os03t0251500-01)                                                                                                                                                   |
| Os12g0640600 | 1985.79  | 0.802504 | 0.006432 |  | 1537.776 | 0.146793 | 0.99986<br>Carotenoid-cleavage dioxygenase (Os12t0640600-01)                                                                                                                                                                                         |
| Os01g0757200 | 208.3968 | 1.499969 | 0.000978 |  | 115.6904 | 0.14558  | 0.99986<br>GA 2-oxidase3, GA metabolism (Os01t0757200-01)                                                                                                                                                                                            |
| Os12g0190000 | 5815.379 | 0.854519 | 0.006621 |  | 4393.34  | 0.144522 | 0.99986<br>GDP-L-galactose phosphorylase, Ascorbate biosynthesis, Stress tolerance, Plant development (Os12t0190000-01);Similar to VTC2. (Os12t0190000-02)                                                                                           |
| Os03g0431200 | 161.1408 | 1.037458 | 0.015368 |  | 111.8948 | 0.144452 | 0.99986<br>Similar to N-acetylglutamate synthase. (Os03t0431200-00)                                                                                                                                                                                  |
| Os11g0618700 | 1132.521 | 0.939918 | 0.009512 |  | 815.6095 | 0.117178 | 0.99986<br>Protein of unknown function DUF594 domain containing protein. (Os11t0618700-01)                                                                                                                                                           |
| Os10g0159800 | 4104.74  | 0.896511 | 3.39E-08 |  | 2993.594 | 0.09784  | 0.99986<br>Alcohol dehydrogenase superfamily, zinc-                                                                                                                                                                                                  |

|              |          |           |          |  |          |           |                                                                                                                                                                      |                                                                                                                                                                                                                         |
|--------------|----------|-----------|----------|--|----------|-----------|----------------------------------------------------------------------------------------------------------------------------------------------------------------------|-------------------------------------------------------------------------------------------------------------------------------------------------------------------------------------------------------------------------|
|              |          |           |          |  |          |           | containing protein.<br>(Os10t0159800-01);Similar<br>to Alcohol dehydrogenase<br>2. (Os10t0159800-<br>03);Similar to Alcohol<br>dehydrogenase 2.<br>(Os10t0159800-04) |                                                                                                                                                                                                                         |
| Os12g0437800 | 769.2863 | 1.358253  | 0.005632 |  | 448.7673 | 0.084992  | 0.99986                                                                                                                                                              | Similar to MPI.<br>(Os12t0437800-01)                                                                                                                                                                                    |
| Os05g0545000 | 5537.048 | 0.557866  | 0.018729 |  | 4602.031 | 0.05358   | 0.99986                                                                                                                                                              | Similar to<br>Phosphatidylinositol<br>transfer-like protein IV.<br>(Os05t0545000-01);Similar<br>to Phosphatidylinositol<br>transfer-like protein III.<br>(Os05t0545000-02)                                              |
| Os02g0803300 | 1184.217 | 0.733386  | 0.005288 |  | 912.8578 | 0.050924  | 0.99986                                                                                                                                                              | Epsin-like, N-terminal<br>domain containing protein.<br>(Os02t0803300-01)                                                                                                                                               |
| Os04g0438600 | 529.754  | -1.075683 | 0.003361 |  | 736.0044 | 0.044968  | 0.99986                                                                                                                                                              | Glycolipid transfer protein,<br>GLTP domain containing<br>protein. (Os04t0438600-01)                                                                                                                                    |
| Os03g0128700 | 4901.81  | 0.588746  | 0.043413 |  | 4005.768 | 0.041751  | 0.99986                                                                                                                                                              | Calcium-dependent protein<br>kinase, isoform 11 (EC<br>2.7.1.-) (CDPK 11).<br>(Os03t0128700-01)                                                                                                                         |
| Os02g0285800 | 200.5841 | 0.909627  | 0.006416 |  | 141.9639 | 0.028785  | 0.99986                                                                                                                                                              | Similar to GTP-binding<br>protein typA (Tyrosine<br>phosphorylated protein A).<br>(Os02t0285800-01);Similar<br>to predicted protein.<br>(Os02t0285800-02)                                                               |
| Os01g0780800 | 580.6384 | 0.669214  | 0.027821 |  | 455.9979 | 0.026208  | 0.99986                                                                                                                                                              | SAND domain-containing<br>protein, Trithorax group<br>factor, Transcriptional<br>regulation of stress<br>responsive genes<br>(Os01t0780800-01);Similar<br>to predicted protein.<br>(Os01t0780800-02)                    |
| Os05g0161800 | 274.3431 | 1.382362  | 0.022373 |  | 154.1448 | 0.016879  | 0.99986                                                                                                                                                              | Calcium-activated<br>(p)ppGpp synthetase,<br>Ca <sup>2+</sup> -<br>activated RelA-SpoT<br>homolog 3 (Os05t0161800-<br>01)                                                                                               |
| Os10g0550900 | 217.88   | 1.782673  | 6.03E-06 |  | 98.44933 | -0.013092 | 0.99986                                                                                                                                                              | Proline dehydrogenase,<br>Negative regulation of<br>thermotolerance<br>(Os10t0550900-01)                                                                                                                                |
| Os03g0784000 | 319.796  | 0.930987  | 0.000359 |  | 220.2974 | -0.019048 | 0.99986                                                                                                                                                              | Similar to<br>deoxyribodipyrimidine<br>photolyase.<br>(Os03t0784000-01);Similar<br>to deoxyribodipyrimidine<br>photolyase.<br>(Os03t0784000-02);FAD<br>dependent oxidoreductase<br>family protein.<br>(Os03t0784000-03) |
| Os12g0145100 | 3455.777 | -0.670889 | 0.044344 |  | 4246.006 | -0.023108 | 0.99986                                                                                                                                                              | Similar to Wali7 protein<br>(Fragment).<br>(Os12t0145100-01)                                                                                                                                                            |
| Os12g0145150 | 3182.517 | -0.672141 | 0.0434   |  | 3908.949 | -0.02507  | 0.99986                                                                                                                                                              | Hypothetical gene.<br>(Os12t0145150-00)                                                                                                                                                                                 |

|              |          |           |          |  |          |           |         |                                                                                                                                                                                                                                                                                   |
|--------------|----------|-----------|----------|--|----------|-----------|---------|-----------------------------------------------------------------------------------------------------------------------------------------------------------------------------------------------------------------------------------------------------------------------------------|
| Os02g0209300 | 150.4635 | 0.852817  | 0.044634 |  | 106.3785 | -0.04669  | 0.99986 | Hypothetical conserved gene. (Os02t0209300-01)                                                                                                                                                                                                                                    |
| Os06g0581300 | 628.8662 | 0.603502  | 0.014562 |  | 492.8906 | -0.060628 | 0.99986 | Hypothetical conserved gene. (Os06t0581300-01);Protein of unknown function DUF1475 family protein. (Os06t0581300-02)                                                                                                                                                              |
| Os01g0847700 | 3469.741 | 0.726963  | 0.006551 |  | 2563.384 | -0.080407 | 0.99986 | Aldo-keto reductase, Detoxification of reactive aldehydes, Abiotic stress tolerance (Os01t0847700-01)                                                                                                                                                                             |
| Os11g0676800 | 308.3532 | -0.83237  | 0.01182  |  | 383.7047 | -0.110315 | 0.99986 | Similar to NB-ARC domain containing protein. (Os11t0676800-00)                                                                                                                                                                                                                    |
| Os05g0161700 | 231.0649 | 1.43874   | 0.023507 |  | 120.6185 | -0.11552  | 0.99986 | Hypothetical protein. (Os05t0161700-01)                                                                                                                                                                                                                                           |
| Os05g0415800 | 1437.832 | -0.734715 | 0.010219 |  | 1727.231 | -0.14005  | 0.99986 | Similar to Cytochrome P450 CYP51H10. (Os05t0415800-01)                                                                                                                                                                                                                            |
| Os01g0696701 | 887.9008 | 0.745859  | 0.030852 |  | 635.6087 | -0.150413 | 0.99986 | Hypothetical protein. (Os01t0696701-00)                                                                                                                                                                                                                                           |
| Os05g0595300 | 810.0499 | -1.129392 | 1.34E-06 |  | 1062.692 | -0.158636 | 0.99986 | NRR alternative splicing variant, Regulation of root development in response to macronutrient deficiency (Os05t0595300-01);CCT domain-containing protein, Regulator of starch synthesis, Regulation of root development in response to macronutrient deficiency (Os05t0595300-02) |
| Os06g0178800 | 63.19855 | -1.453754 | 0.00378  |  | 87.01549 | -0.212129 | 0.99986 | Hypothetical protein. (Os06t0178800-00)                                                                                                                                                                                                                                           |
| Os06g0178700 | 64.52597 | -1.493816 | 0.003021 |  | 89.16293 | -0.223642 | 0.99986 | Similar to Iron/ascorbate-dependent oxidoreductase. (Os06t0178700-01)                                                                                                                                                                                                             |
| Os07g0604000 | 1273.029 | -1.021141 | 0.00021  |  | 1588.92  | -0.238125 | 0.99986 | Similar to 6-phosphogluconolactonase-like protein. (Os07t0604000-01);Similar to 6-phosphogluconolactonase-like protein. (Os07t0604000-02)                                                                                                                                         |
| Os01g0521600 | 327.6742 | -0.963439 | 0.020006 |  | 403.3692 | -0.240231 | 0.99986 | Similar to NB-ARC domain containing protein, expressed. (Os01t0521600-00)                                                                                                                                                                                                         |
| Os12g0594950 | 47.91554 | -1.489867 | 0.028189 |  | 65.57154 | -0.256058 | 0.99986 | Hypothetical conserved gene. (Os12t0594950-01)                                                                                                                                                                                                                                    |
| Os07g0531400 | 193.5514 | -1.093382 | 0.035572 |  | 242.8882 | -0.270189 | 0.99986 | Similar to Peroxidase 27 precursor (EC 1.11.1.7) (Atperox P27) (PRXR7) (ATP12a). (Os07t0531400-01);Plant peroxidase domain containing protein. (Os07t0531400-02)                                                                                                                  |
| Os01g0711400 | 2499.597 | -0.843407 | 0.022362 |  | 2952.62  | -0.276954 | 0.99986 | Similar to Victorin binding protein. (Os01t0711400-01)                                                                                                                                                                                                                            |
| Os09g0549450 | 2537.794 | -0.760026 | 0.001996 |  | 2922.336 | -0.292911 | 0.99986 | NLP family transcriptional factor, Promotion of                                                                                                                                                                                                                                   |

|              |          |           |          |  |          |           |          |                                                                                                                                                    |
|--------------|----------|-----------|----------|--|----------|-----------|----------|----------------------------------------------------------------------------------------------------------------------------------------------------|
|              |          |           |          |  |          |           |          | nitrogen use efficiency (NUE), Transactivation of nitrogen assimilation gene OsNiR (Os09t0549450-01)                                               |
| Os08g0500800 | 1139.115 | -0.582883 | 0.017399 |  | 1244.119 | -0.310255 | 0.99986  | WLM domain containing protein. (Os08t0500800-01)                                                                                                   |
| Os11g0609500 | 484.6858 | -0.880319 | 0.002772 |  | 570.6574 | -0.317271 | 0.99986  | Similar to Jacalin-like lectin domain containing protein. (Os11t0609500-01)                                                                        |
| Os11g0670900 | 78.77166 | -1.874318 | 0.022973 |  | 112.2464 | -0.320359 | 0.99986  | Conserved hypothetical protein. (Os11t0670900-01)                                                                                                  |
| Os10g0506100 | 1132.693 | -0.878088 | 0.000601 |  | 1331.048 | -0.322252 | 0.99986  | Heavy metal transport/detoxification protein domain containing protein. (Os10t0506100-01)                                                          |
| Os05g0429400 | 2110.871 | -1.082103 | 0.028189 |  | 2596.707 | -0.325739 | 0.99986  | Phosphatidylinositol transfer protein-like, N-terminal domain containing protein. (Os05t0429400-01)                                                |
| Os05g0337200 | 549.1798 | -0.772014 | 0.025428 |  | 623.4037 | -0.349112 | 0.99986  | Helix-loop-helix DNA-binding domain containing protein. (Os05t0337200-01)                                                                          |
| Os05g0407100 | 94.702   | -1.089199 | 0.00494  |  | 115.9235 | -0.352551 | 0.99986  | Four F5 protein family protein. (Os05t0407100-01)                                                                                                  |
| Os10g0345701 | 110.2201 | -0.951487 | 0.034923 |  | 130.0065 | -0.369979 | 0.99986  | Hypothetical conserved gene. (Os10t0345701-01)                                                                                                     |
| Os08g0416800 | 1083.619 | -0.802595 | 0.002074 |  | 1227.03  | -0.382125 | 0.99986  | Conserved hypothetical protein. (Os08t0416800-01)                                                                                                  |
| Os08g0495500 | 2517.105 | -0.727814 | 0.00021  |  | 2791.956 | -0.387149 | 0.90027  | Kelch related domain containing protein. (Os08t0495500-01)                                                                                         |
| Os01g0719600 | 526.2307 | -0.70079  | 0.022362 |  | 578.1163 | -0.396401 | 0.99986  | Heavy metal transport/detoxification protein domain containing protein. (Os01t0719600-01)                                                          |
| Os12g0431300 | 42.34651 | -2.356488 | 0.007239 |  | 62.84564 | -0.3976   | 0.99986  | Six-bladed beta-propeller, TolB-like domain containing protein. (Os12t0431300-01)                                                                  |
| Os11g0151500 | 1032.057 | -1.184456 | 0.00238  |  | 1261.263 | -0.422712 | 0.99986  | Major facilitator superfamily protein. (Os11t0151500-01)                                                                                           |
| Os02g0782900 | 973.0263 | -0.736289 | 0.022096 |  | 1070.306 | -0.423564 | 0.973604 | Conserved hypothetical protein. (Os02t0782900-01)                                                                                                  |
| Os01g0605700 | 194.6364 | -1.482442 | 0.001336 |  | 250.4002 | -0.447951 | 0.99986  | Mtn3 and saliva related transmembrane protein family protein. (Os01t0605700-01)                                                                    |
| Os04g0598800 | 187.523  | -0.981598 | 0.012142 |  | 216.3294 | -0.466497 | 0.99986  | Similar to Wall-associated kinase-like protein. (Os04t0598800-01)                                                                                  |
| Os06g0115600 | 616.901  | -0.923855 | 0.011682 |  | 701.9956 | -0.466892 | 0.99986  | Plant-specific protein with a short C-terminal coiled-coil domain and a functional NLS, Common symbiosis signaling (SYM) pathway (Os06t0115600-01) |
| Os09g0272900 | 935.0844 | -1.033947 | 0.00261  |  | 1086.328 | -0.483268 | 0.99986  | Disease resistance protein domain containing protein. (Os09t0272900-01);Hypothetical conserved gene. (Os09t0272900-02)                             |
| Os05g0592300 | 608.2361 | -0.778337 | 0.00108  |  | 663.8019 | -0.487221 | 0.881556 | Protein of unknown function DUF1637 family                                                                                                         |



|              |          |           |          |  |          |           |                                                                           |                                                                                                                                                                         |
|--------------|----------|-----------|----------|--|----------|-----------|---------------------------------------------------------------------------|-------------------------------------------------------------------------------------------------------------------------------------------------------------------------|
|              |          |           |          |  |          |           | protein. (Os05t0592300-01);Similar to Cupin, RmlC-type. (Os05t0592300-02) |                                                                                                                                                                         |
| Os11g0104300 | 171.0992 | -1.512551 | 0.029941 |  | 218.0238 | -0.49909  | 0.99986                                                                   | Substrate of the SCF<sup>D3</sup> ubiquitination complex, Repressor of strigolactone (SL) signalling (Os11t0104300-01)                                                  |
| Os09g0311600 | 931.8429 | -0.807395 | 0.000123 |  | 1020.382 | -0.501601 | 0.99986                                                                   | Similar to NBS-LRR type resistance protein (Fragment). (Os09t0311600-01)                                                                                                |
| Os02g0575000 | 504.8381 | 1.064649  | 0.003021 |  | 279.2303 | -0.520173 | 0.99986                                                                   | Conserved hypothetical protein. (Os02t0575000-01)                                                                                                                       |
| Os03g0329200 | 110.6316 | -1.196215 | 0.025308 |  | 131.3741 | -0.528327 | 0.99986                                                                   | Nucleotide-binding, alpha-beta plait domain containing protein. (Os03t0329200-01);Similar to cDNA clone:J013002B05, full insert sequence. (Os03t0329200-02)             |
| Os12g0568350 | 41498.86 | 0.008248  | 0.999758 |  | 35174.5  | -0.543028 | 0.042509                                                                  | Hypothetical gene. (Os12t0568350-01)                                                                                                                                    |
| Os12g0568500 | 41489.64 | -0.008471 | 0.999758 |  | 35312.85 | -0.548888 | 0.040984                                                                  | Metallothionein-like protein type 1. (Os12t0568500-01)                                                                                                                  |
| Os03g0368300 | 669.274  | -1.204318 | 0.035493 |  | 787.5674 | -0.567349 | 0.99986                                                                   | Similar to Peroxidase 1. (Os03t0368300-01)                                                                                                                              |
| Os03g0427000 | 394.0106 | -0.995599 | 0.009588 |  | 440.9801 | -0.581629 | 0.970711                                                                  | Similar to Circadian clock coupling factor ZGT. (Os03t0427000-01)                                                                                                       |
| Os01g0878300 | 1483.499 | -0.909303 | 0.001996 |  | 1624.779 | -0.589188 | 0.50379                                                                   | Protein kinase, core domain containing protein. (Os01t0878300-01);Hypothetical conserved gene. (Os01t0878300-02)                                                        |
| Os03g0103300 | 2046.532 | -0.930839 | 0.000258 |  | 2252.439 | -0.589383 | 0.878752                                                                  | Hybrid proline- or glycine-rich protein, Controll of low-temperature germinability, Pre-harvest sprouting resistance (Os03t0103300-01)                                  |
| Os03g0803500 | 226.5778 | -1.207081 | 0.02855  |  | 264.2787 | -0.606191 | 0.99986                                                                   | Similar to Prolyl 4-hydroxylase alpha-1 subunit-like protein. (Os03t0803500-01)                                                                                         |
| Os06g0611900 | 132.5439 | -1.171978 | 0.006113 |  | 153.0897 | -0.614253 | 0.99986                                                                   | Similar to Glycine decarboxylase P subunit. (Os06t0611900-01);Similar to Victorin binding protein. (Os06t0611900-02)                                                    |
| Os02g0168400 | 309.9884 | -0.879877 | 0.000491 |  | 333.0651 | -0.634384 | 0.450013                                                                  | Hypothetical conserved gene. (Os02t0168400-01)                                                                                                                          |
| Os08g0380100 | 193.6783 | -1.765298 | 0.020594 |  | 246.8695 | -0.649888 | 0.99986                                                                   | Similar to Polygalacturonase isoenzyme 1 beta subunit (Fragment). (Os08t0380100-01);Similar to Polygalacturonase isoenzyme 1 beta subunit (Fragment). (Os08t0380100-02) |

|              |          |           |          |  |          |           |          |                                                                                                                                             |
|--------------|----------|-----------|----------|--|----------|-----------|----------|---------------------------------------------------------------------------------------------------------------------------------------------|
| Os02g0631100 | 99.47117 | -1.122411 | 0.021335 |  | 112.194  | -0.657446 | 0.99986  | Photosystem II oxygen evolving complex protein PsbQ family protein. (Os02t0631100-01)                                                       |
| Os02g0208500 | 420.3918 | -0.753079 | 0.00921  |  | 433.5707 | -0.666264 | 0.066661 | Conserved hypothetical protein. (Os02t0208500-01)                                                                                           |
| Os04g0518100 | 2411.893 | -1.50767  | 0.017327 |  | 2924.937 | -0.670826 | 0.99986  | Phenylalanine ammonia-lyase. (Os04t0518100-01)                                                                                              |
| Os08g0203700 | 466.4239 | -0.796655 | 0.028189 |  | 485.1945 | -0.674353 | 0.99986  | Protein kinase, core domain containing protein. (Os08t0203700-01);Similar to SHR5-receptor-like kinase (Fragment). (Os08t0203700-02)        |
| Os05g0363533 | 161.3955 | -1.139541 | 0.004194 |  | 181.2163 | -0.691928 | 0.99986  | Non-protein coding transcript. (Os05t0363533-00)                                                                                            |
| Os05g0363500 | 1000.511 | -1.304686 | 0.000121 |  | 1159.222 | -0.701274 | 0.638892 | Hypothetical conserved gene. (Os05t0363500-01)                                                                                              |
| Os05g0140334 | 893.8656 | 0.324582  | 0.75793  |  | 639.5617 | -0.741584 | 0.038756 | Hypothetical protein. (Os05t0140334-00)                                                                                                     |
| Os03g0159900 | 113.938  | -1.347522 | 0.000491 |  | 131.7066 | -0.742545 | 0.529143 | Hypothetical conserved gene. (Os03t0159900-01);Hypothetical conserved gene. (Os03t0159900-02)                                               |
| Os03g0273200 | 521.1081 | -1.8843   | 0.020802 |  | 656.908  | -0.756666 | 0.99986  | Similar to Laccase (EC 1.10.3.2). (Os03t0273200-01);Similar to Laccase (EC 1.10.3.2). (Os03t0273200-02)                                     |
| Os08g0124500 | 225.7852 | -0.711914 | 0.03773  |  | 224.9064 | -0.757848 | 0.048415 | Similar to Resistance protein candidate (Fragment). (Os08t0124500-01);Similar to Resistance protein candidate (Fragment). (Os08t0124500-02) |
| Os08g0507702 | 27.14353 | -2.56515  | 0.026828 |  | 37.19586 | -0.761404 | 0.99986  | Cytochrome P450 family protein. (Os08t0507702-01)                                                                                           |
| Os10g0481300 | 187.8144 | -1.460623 | 0.001276 |  | 218.508  | -0.800708 | 0.99986  | Similar to Glutathione S-transferase, N-terminal domain containing protein, expressed. (Os10t0481300-01)                                    |
| Os04g0635650 | 118.791  | -1.367056 | 0.022754 |  | 134.507  | -0.843602 | 0.688906 | Non-protein coding transcript. (Os04t0635650-00)                                                                                            |
| Os04g0635100 | 142.1739 | -1.499138 | 0.015922 |  | 164.5241 | -0.854673 | 0.749163 | Similar to H0315F07.12 protein. (Os04t0635100-00)                                                                                           |
| Os08g0373400 | 45.47449 | -1.496541 | 0.044954 |  | 52.07302 | -0.887314 | 0.99986  | Conserved hypothetical protein. (Os08t0373400-00)                                                                                           |
| Os04g0635201 | 110.8191 | -1.597997 | 0.022108 |  | 129.3784 | -0.8901   | 0.903287 | Non-protein coding transcript. (Os04t0635201-00)                                                                                            |
| Os02g0782550 | 40.7355  | -3.050394 | 1.60E-06 |  | 55.82238 | -0.936809 | 0.511732 | Hypothetical protein. (Os02t0782550-00)                                                                                                     |
| Os09g0548200 | 148.4856 | -1.480026 | 0.0434   |  | 167.706  | -0.939058 | 0.99986  | Peptidoglycan-binding Lysin subgroup domain containing protein. (Os09t0548200-01)                                                           |
| Os02g0782500 | 41.23887 | -3.070153 | 1.30E-06 |  | 56.51796 | -0.942928 | 0.50379  | Similar to Small heat stress protein class CIII. (Os02t0782500-01);Similar to 17.5 kDa class II heat                                        |

|              |          |           |          |  |          |           |                                                                                                                                                                                                                 |
|--------------|----------|-----------|----------|--|----------|-----------|-----------------------------------------------------------------------------------------------------------------------------------------------------------------------------------------------------------------|
|              |          |           |          |  |          |           | shock protein.<br>(Os02t0782500-02)                                                                                                                                                                             |
| Os01g0217000 | 367.9313 | -1.681926 | 0.037469 |  | 414.9485 | -1.091207 | 0.99986<br>Protein of unknown<br>function DUF231, plant<br>domain containing protein.<br>(Os01t0217000-01);Similar<br>to Alpha galactosidase.<br>(Os01t0217000-02)                                              |
| Os04g0105400 | 182.541  | -1.904713 | 0.044468 |  | 212.6789 | -1.100596 | 0.99986<br>Similar to B0616E02-<br>H0507E05.3 protein.<br>(Os04t0105400-01)                                                                                                                                     |
| Os01g0880850 | 145.1224 | -2.469636 | 1.77E-05 |  | 178.0851 | -1.188285 | 0.564647<br>Hypothetical protein.<br>(Os01t0880850-00)                                                                                                                                                          |
| Os01g0226600 | 138.6312 | -1.943465 | 0.037469 |  | 158.0781 | -1.22712  | 0.99986<br>Similar to C4-dicarboxylate<br>transporter/malic acid<br>transport protein.<br>(Os01t0226600-01);Similar<br>to C4-dicarboxylate<br>transporter/malic acid<br>transport protein.<br>(Os01t0226600-02) |
| Os01g0880800 | 148.393  | -2.419596 | 0.000113 |  | 178.7673 | -1.250275 | 0.569292<br>Similar to Acyl-[acyl-<br>carrier-protein] desaturase,<br>chloroplast precursor (EC<br>1.14.19.2) (Stearoyl-ACP<br>desaturase).<br>(Os01t0880800-01)                                                |
| Os12g0495600 | 72.29434 | -1.344935 | 0.008128 |  | 74.15691 | -1.251411 | 0.807863<br>NB-ARC domain<br>containing protein.<br>(Os12t0495600-01)                                                                                                                                           |
| Os01g0795050 | 998.0303 | -0.245791 | 0.999758 |  | 772.5858 | -1.265891 | 0.00056<br>Hypothetical gene.<br>(Os01t0795050-01)                                                                                                                                                              |
| Os01g0843800 | 39.53344 | -2.454582 | 0.017834 |  | 47.08179 | -1.332748 | 0.99986<br>Similar to L-ascorbate<br>oxidase. (Os01t0843800-<br>00)                                                                                                                                             |
| Os01g0795000 | 1593.858 | -0.192999 | 0.999758 |  | 1193.077 | -1.349451 | 0.001221<br>Subtilase. (Os01t0795000-<br>01)                                                                                                                                                                    |
| Os04g0567200 | 58.79878 | -2.211937 | 0.000674 |  | 67.74961 | -1.364064 | 0.282038<br>Uncharacterised protein<br>family UPF0005 domain<br>containing protein.<br>(Os04t0567200-01)                                                                                                        |
| Os05g0424300 | 47.41355 | -2.24385  | 0.029941 |  | 54.72882 | -1.369413 | 0.99986<br>Cytochrome P450 family<br>protein. (Os05t0424300-01)                                                                                                                                                 |
| Os01g0126900 | 340.5562 | -2.420559 | 0.006113 |  | 395.6786 | -1.432002 | 0.99986<br>Multicopper oxidase<br>(Os01t0126900-01)                                                                                                                                                             |
| Os03g0219100 | 195.0948 | -2.687035 | 0.002221 |  | 231.2565 | -1.469177 | 0.99986<br>Cellular retinaldehyde-<br>binding/triple function, C-<br>terminal domain containing<br>protein. (Os03t0219100-01)                                                                                   |
| Os12g0472900 | 93.53642 | -2.836479 | 7.71E-05 |  | 110.057  | -1.590391 | 0.619175<br>Hypothetical protein.<br>(Os12t0472900-00)                                                                                                                                                          |
| Os07g0565100 | 313.1866 | -0.54736  | 0.77227  |  | 247.4976 | -1.644833 | 9.69E-05<br>Similar to 40S ribosomal<br>protein S11.<br>(Os07t0565100-00)                                                                                                                                       |
| Os01g0318400 | 14.21258 | -3.251638 | 0.006416 |  | 16.88819 | -1.749834 | 0.849414<br>Conserved hypothetical<br>protein. (Os01t0318400-00)                                                                                                                                                |
| Os04g0587400 | 21.29822 | -3.261235 | 0.032607 |  | 25.18764 | -1.759851 | 0.99986<br>Protein of unknown<br>function DUF250 domain<br>containing protein.<br>(Os04t0587400-01)                                                                                                             |
| Os03g0257600 | 90.53777 | -2.583376 | 0.012291 |  | 100.2009 | -1.819168 | 0.565095<br>Hypothetical conserved<br>gene. (Os03t0257600-01)                                                                                                                                                   |
| Os12g0472800 | 226.0648 | -3.170641 | 0.000328 |  | 258.752  | -1.919698 | 0.625326<br>B repeat unit of collagen<br>binding surface protein                                                                                                                                                |

|              |          |           |          |  |          |           |                                                                                                                                                                         |
|--------------|----------|-----------|----------|--|----------|-----------|-------------------------------------------------------------------------------------------------------------------------------------------------------------------------|
|              |          |           |          |  |          |           | (cna) containing protein.<br>(Os12t0472800-01)                                                                                                                          |
| Os02g0665300 | 28.51481 | -3.849629 | 0.010578 |  | 31.35657 | -2.579088 | 0.666681<br>Peptidase S8, subtilisin-related domain containing protein. (Os02t0665300-01);Peptidase S8, subtilisin-related domain containing protein. (Os02t0665300-02) |
| Os03g0226200 | 71.52727 | 0.077959  | 0.999758 |  | 38.31174 | -3.459743 | 0.000234<br>Non-symbiotic hemoglobin, Phytoglobin, Response to low mineral nutrients and abiotic stresses<br>(Os03t0226200-01)                                          |
